# Supplementary material
Source: Copernicus journal article supplement (doi:10.5194/egusphere-2026-1745)
Supplement: Supplementary file 1 [file egusphere-2026-1745-supplement.pdf]

# Supplement Material

## High-frequency monitoring of SO<sub>2</sub> plumes from small volcanic eruptions using a synergy of GEO and LEO satellites: A case study of the 2024 Kanlaon eruption

Shangyi Liu<sup>1</sup>, Yingjun Zheng<sup>1</sup>, Mengya Sheng<sup>1</sup>, Lu Lee<sup>2</sup>, Chengli Qi<sup>2</sup>, Feng Lu<sup>2</sup>, Bruno Franco<sup>3</sup>, Lieven Clarisse<sup>3</sup>, Cathy Clerbaux<sup>3,4</sup>, Nicolas Theys<sup>5</sup>, Jhoon Kim<sup>6,7</sup>, Zhao-Cheng Zeng<sup>1,\*</sup>

<sup>1</sup> School of Earth and Space Sciences, Peking University, Beijing, China

<sup>2</sup> Innovation Center for FengYun Meteorological Satellite, Key Laboratory of Radiometric Calibration and Validation for Environmental Satellites, National Satellite Meteorological Center, China Meteorological Administration, Beijing 100081, China

<sup>3</sup> Université libre de Bruxelles (ULB), BLU-ULB research Center, Spectroscopy, Quantum Chemistry and Atmospheric Remote Sensing (SQUARES), Brussels, Belgium

<sup>4</sup> LATMOS/IPSL, Sorbonne Université, UVSQ, CNRS, Paris, France

<sup>5</sup> Royal Belgian Institute for Space Aeronomy (BIRA-IASB), Brussels, Belgium

<sup>6</sup> Department of Atmospheric Science, Yonsei University, Seoul, Korea

<sup>7</sup> Max Planck Institute for Meteorology, Hamburg, Germany

Correspondence to: Zhao-Cheng Zeng ([zczeng@pku.edu.cn](mailto:zczeng@pku.edu.cn))

Address: No.5 Yiheyuan Road, Haidian District, Beijing 100871, P. R. China

|    |                              |
|----|------------------------------|
| 23 | <b>Contents of this file</b> |
| 24 | Text S1                      |
| 25 | Table S1                     |
| 26 | Figures S1 to S29            |
| 27 |                              |

## 28 **Text S1: The forward model**

29 In the forward simulations, the top-of-atmosphere radiance received by the sensor is modeled as the  
30 summation of four radiative components: (a) surface thermal emission, (b) upwelling atmospheric  
31 emission, (c) downwelling atmospheric radiance reflected by the surface, and (d) reflected solar radiation.  
32 Molecular and aerosol scattering are considered negligible in the thermal infrared region and are thus  
33 excluded. For numerical implementation, the atmosphere is discretized into a fixed 34-layer pressure grid  
34 ranging from 1000 hPa to 1 hPa (see Table S1). The vertical resolution is approximately 1 km below 25  
35 km and increases to 2.5 km above this altitude (based on the USSA model). The thickness of the bottom  
36 layer is dynamically adjusted based on the actual surface pressure. More detailed description described in  
37 **Zeng et al. (2023a)**.

38 Input parameters for the forward model are derived from multiple high-resolution datasets. Profiles  
39 for atmospheric temperature, water vapor, and O<sub>3</sub>, along with surface skin temperature and surface  
40 pressure, are sourced from the European Centre for Medium-Range Weather Forecasts (ECMWF)  
41 Reanalysis v5 (ERA5) (**Hersbach et al., 2020**). CO<sub>2</sub> profiles are obtained from the ECMWF CAMS model.  
42 The prior vertical distribution of SO<sub>2</sub> and other interfering species follow the Line-By-Line Radiative  
43 Transfer Model (LBLRTM) standard atmospheric backgrounds. Surface emissivity is derived from the  
44 University of Wisconsin-Madison Global Infrared Land Surface Emissivity database (**Seemann et al.,**  
45 **2008**). To optimize computational efficiency, gas absorption coefficients were pre-calculated using the  
46 LBLRTM v12.11 to construct look-up tables (LUTs). This spectroscopic database, based on HITRAN  
47 (**Clough et al., 2005; Rothman et al., 2013**), encompasses 50 pressure levels and 15 temperature levels  
48 ranging from 180 K to 320 K at 10 K intervals.

49  
50

## 51 **Reference**

- 52 Clough, S. A., Shephard, M. W., Mlawer, E. J., Delamere, J. S., Iacono, M. J., Cady-Pereira, K., Boukabara,  
53 S., & Brown, P. D. (2005). Atmospheric radiative transfer modeling: A summary of the AER codes.  
54 *Journal of Quantitative Spectroscopy and Radiative Transfer*, 91(2), 233–244.  
55 <https://doi.org/10.1016/j.jqsrt.2004.05.058>
- 56 Hersbach, H., Bell, B., Berrisford, P., Hirahara, S., Horányi, A., Muñoz-Sabater, J., Nicolas, J., Peubey, C.,  
57 Radu, R., Schepers, D., Simmons, A., Soci, C., Abdalla, S., Abellan, X., Balsamo, G., Bechtold, P.,  
58 Biavati, G., Bidlot, J., Bonavita, M., ... Thépaut, J. (2020). The ERA5 global reanalysis. *Quarterly*  
59 *Journal of the Royal Meteorological Society*, 146(730), 1999–2049. <https://doi.org/10.1002/qj.3803>
- 60 Rothman, L. S., Gordon, I. E., Babikov, Y., Barbe, A., Chris Benner, D., Bernath, P. F., Birk, M., Bizzocchi,  
61 L., Boudon, V., Brown, L. R., Campargue, A., Chance, K., Cohen, E. A., Coudert, L. H., Devi, V.  
62 M., Drouin, B. J., Fayt, A., Flaud, J.-M., Gamache, R. R., ... Wagner, G. (2013). The HITRAN2012  
63 molecular spectroscopic database. *Journal of Quantitative Spectroscopy and Radiative Transfer*,  
64 130, 4–50. <https://doi.org/10.1016/j.jqsrt.2013.07.002>
- 65 Seemann, S. W., Borbas, E. E., Knuteson, R. O., Stephenson, G. R., & Huang, H.-L. (2008). Development  
66 of a global infrared land surface emissivity database for application to clear sky sounding retrievals  
67 from multispectral satellite radiance measurements. *Journal of Applied Meteorology and*  
68 *Climatology*, 47(1), 108–123. <https://doi.org/10.1175/2007JAMC1590.1>
- 69 Zeng, Z.-C., Lee, L., & Qi, C. (2023a). Diurnal carbon monoxide observed from a geostationary infrared  
70 hyperspectral sounder: First result from GIIRS on board FengYun-4B. *Atmospheric Measurement*  
71 *Techniques*, 16(12), 3059–3083. <https://doi.org/10.5194/amt-16-3059-2023>

72

**Table S1.** Pressure-level definitions in our forward model vertical grid

| Layer idex | Top Pressure (hPa) | Layer idex | Top Pressure |
|------------|--------------------|------------|--------------|
| 1          | 1013               | 19         | 75.65        |
| 2          | 898.8              | 20         | 64.67        |
| 3          | 795.0              | 21         | 55.29        |
| 4          | 701.2              | 22         | 47.29        |
| 5          | 616.6              | 23         | 40.47        |
| 6          | 540.5              | 24         | 34.67        |
| 7          | 472.2              | 25         | 29.72        |
| 8          | 411.1              | 26         | 25.49        |
| 9          | 356.5              | 27         | 17.43        |
| 10         | 308.0              | 28         | 11.97        |
| 11         | 265.0              | 29         | 8.01         |
| 12         | 227.0              | 30         | 5.75         |
| 13         | 194.0              | 31         | 4.15         |
| 14         | 165.8              | 32         | 2.87         |
| 15         | 141.7              | 33         | 2.06         |
| 16         | 121.1              | 34         | 1.49         |
| 17         | 103.5              | 35         | 1.09         |
| 18         | 88.5               |            |              |

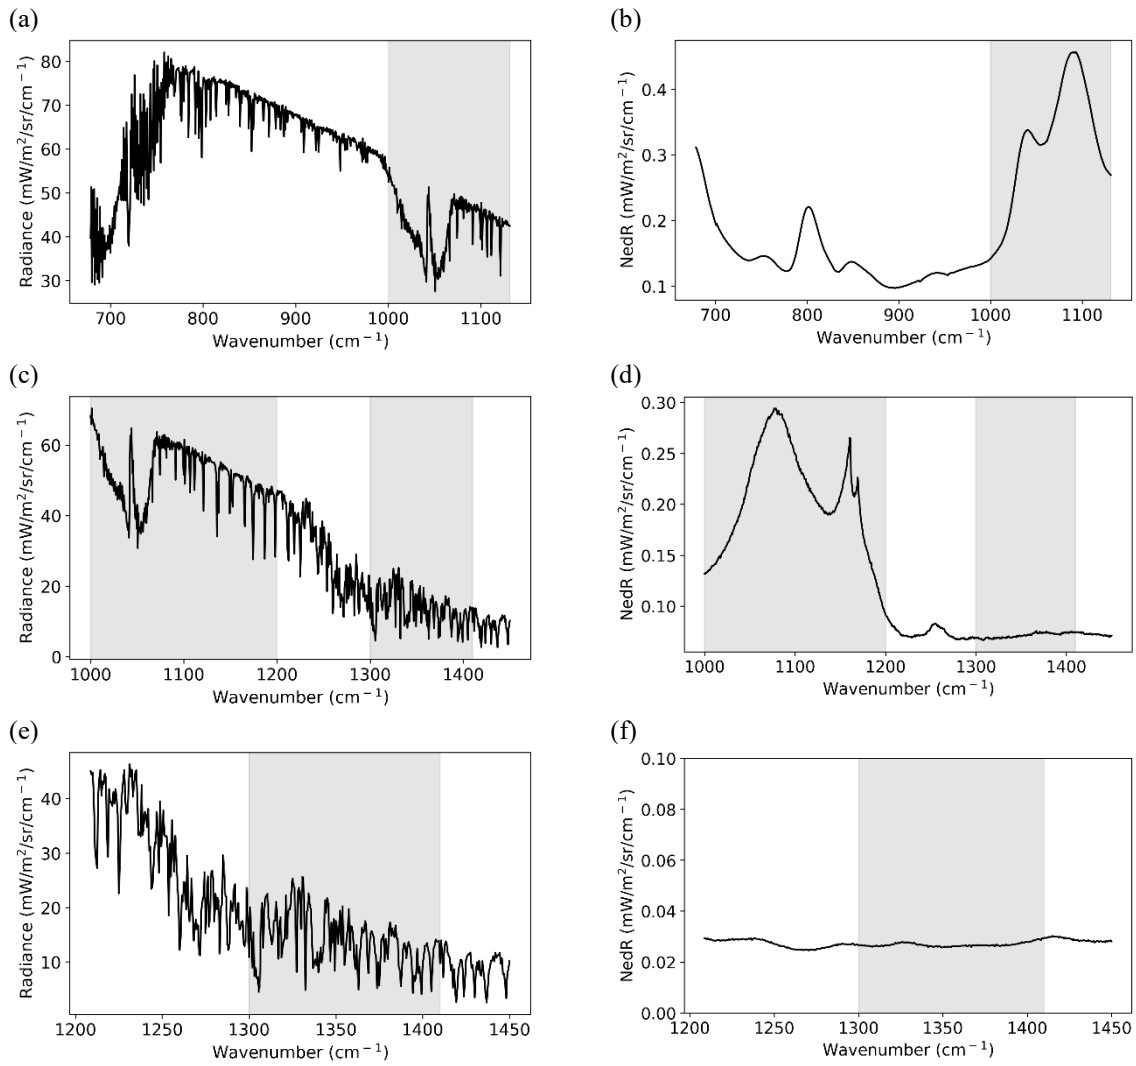

76 **Figure S1. Spectral characteristics and noise performance of the hyperspectral infrared sounders used in**  
 77 **this study. (a, c, e) Mean observed long-wave infrared spectra from FY-4B/GIIRS, FY-3E/3F HIRAS, and**  
 78 **JPSS-1/2 CrIS, respectively, collected on June 2, 2024, over the potential volcanic plume region. (b, d, f)**  
 79 **Corresponding on-orbit Noise Equivalent differential Radiance (NEdR) for each sensor. The gray shaded**  
 80 **regions indicate the spectral windows selected for the physical retrieval algorithm:  $\nu_1$  (1000–1200  $\text{cm}^{-1}$ ) and**  
 81  **$\nu_3$  (1300–1410  $\text{cm}^{-1}$ ).**

82

83

(a)

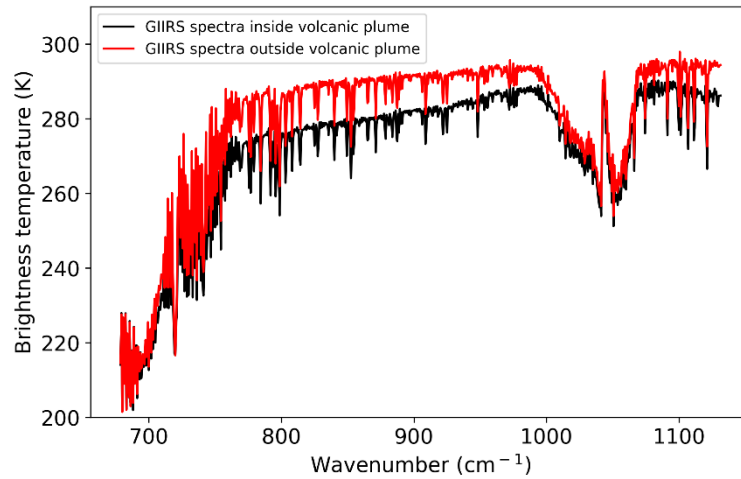

(b)

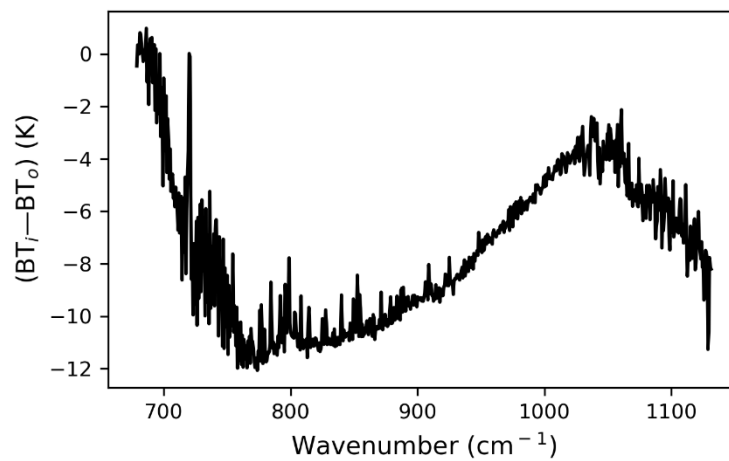

84 **Figure S2. (a) FY-4B/GHIRS LWIR spectra (in brightness temperature (BT)) recorded on 3 June 2024 (16.3**  
85 **UTC). The black curve denotes the spectrum measured within the volcanic plume, and the spectrum in red**  
86 **is taken from a nearby pixel outside the plume. (b) The BT difference ( $\Delta BT = BT_{in} - BT_{out}$ ) between**  
87 **the two spectra, showing the spectral signatures of ice crystal, volcanic ash and  $SO_2$  in the v1 band.**  
88

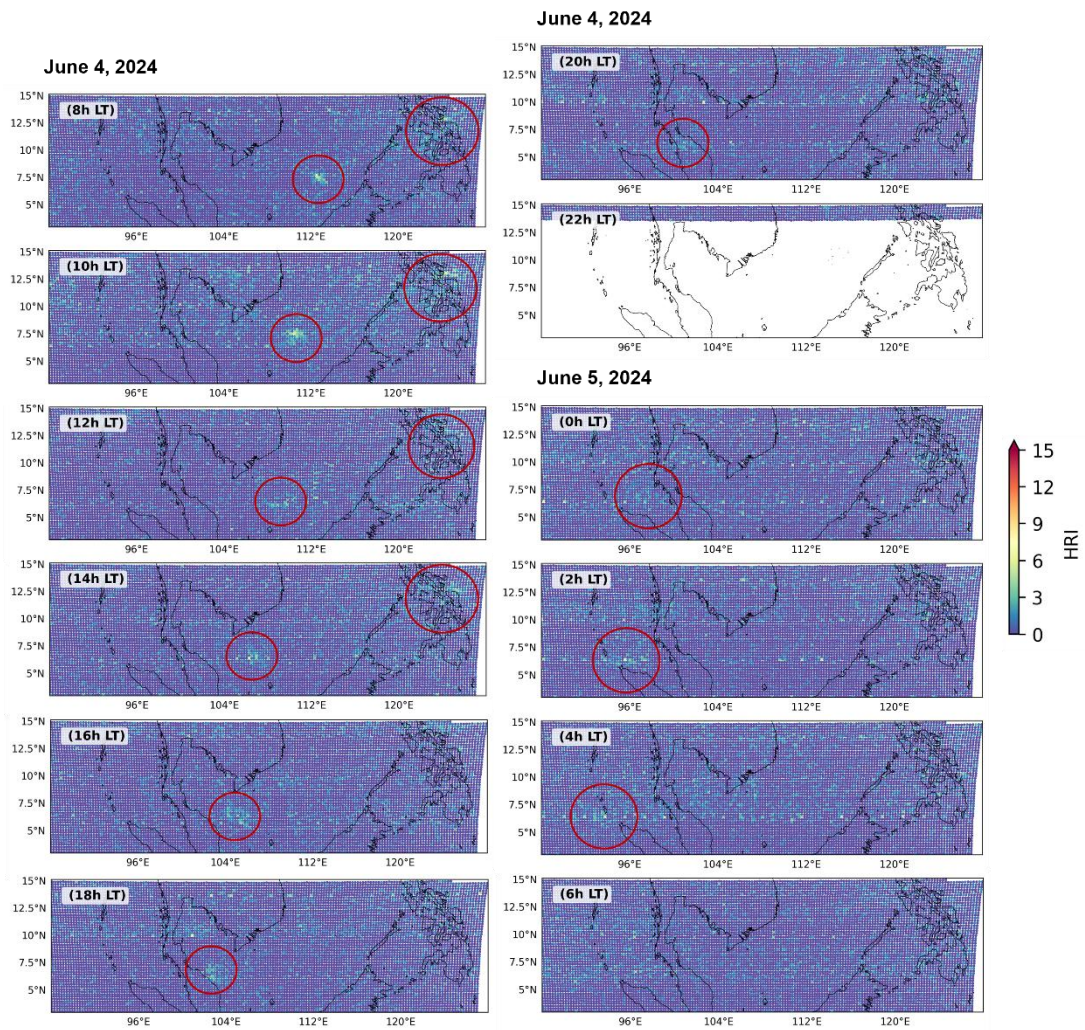

89  
90  
91  
92  
93  
94

**Figure S3. Spatial distribution of the SO<sub>2</sub> HRI derived from FY-4B/GIIRS observations subsequent to the period shown in Figure 5. The panels cover the remaining observation hours on June 4 and 0h–6h LT on June 5, 2024. Red circles indicate areas with high HRI values, tracking the core of the volcanic plume.**

June 3, 2024

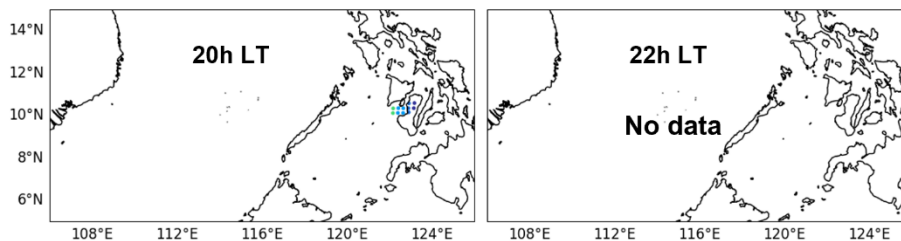

June 4, 2024

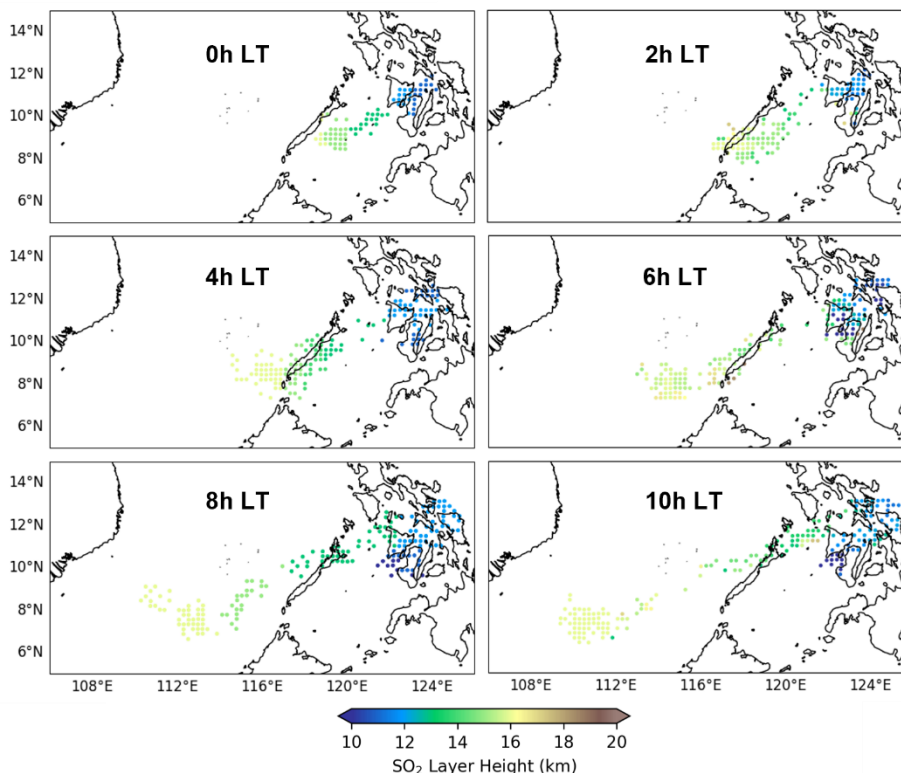

95  
96  
97  
98  
99  
100

**Figure S4. Spatial distribution of the SO<sub>2</sub> plume layer height for FY-4B/GIIRS SO<sub>2</sub> total column retrievals. The plume height information is derived from synergistic observations by FY-3E/F HIRAS and JPSS-1/2 CrIS.**

June 3, 2024

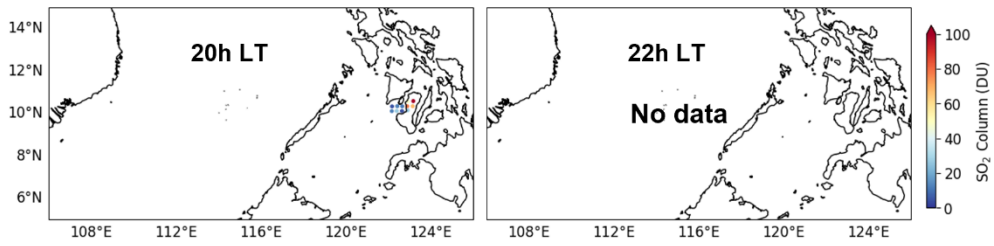

June 4, 2024

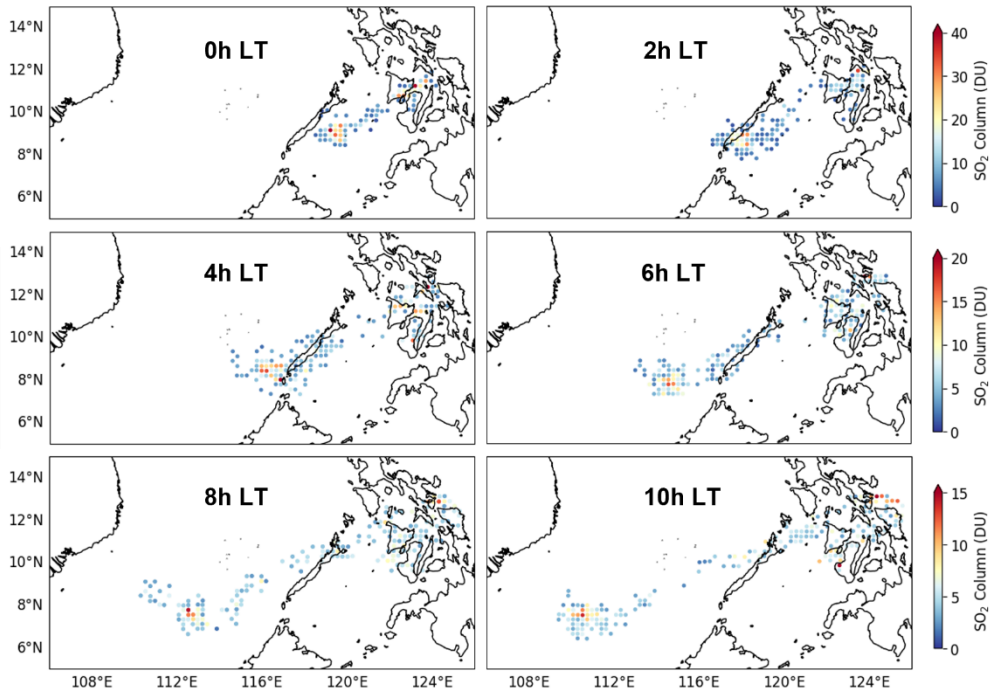

101  
102  
103  
104  
105

Figure S5. Spatial distribution of SO<sub>2</sub> total column retrieved from FY-4B/GIIRS. The panels correspond to the observations shown in Fig. 5 but within independent color scales.

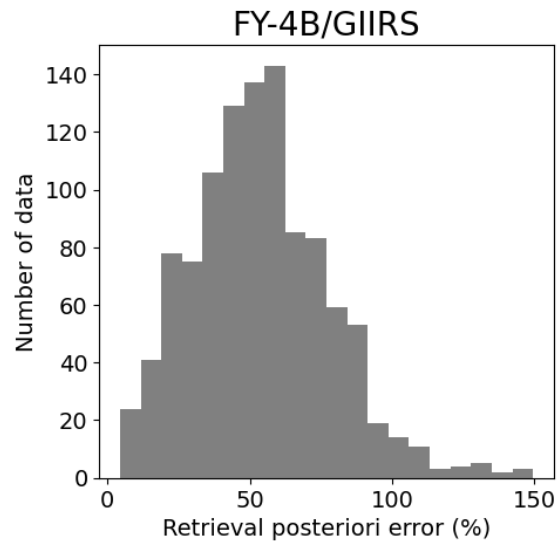

106  
 107  
 108  
 109  
 110  
 111

**Figure S6. Estimated posterior retrieval error for FY-4B/GIIRS SO<sub>2</sub> total column. The histogram illustrates the statistical spread of retrieval uncertainties, with a mean estimated error of  $53.7 \pm 24.1\%$ .**

(a) June 4, 2024

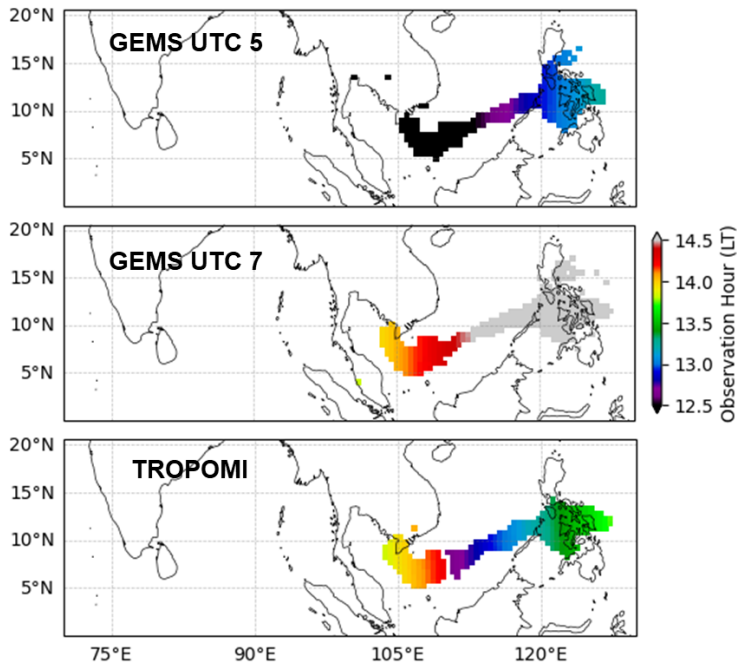

(b) June 4, 2024

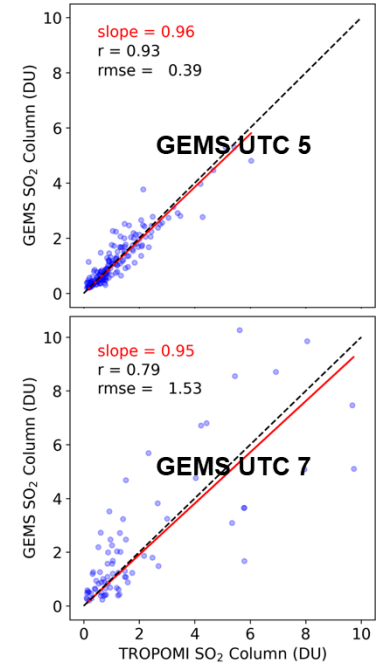

(c) June 5, 2024

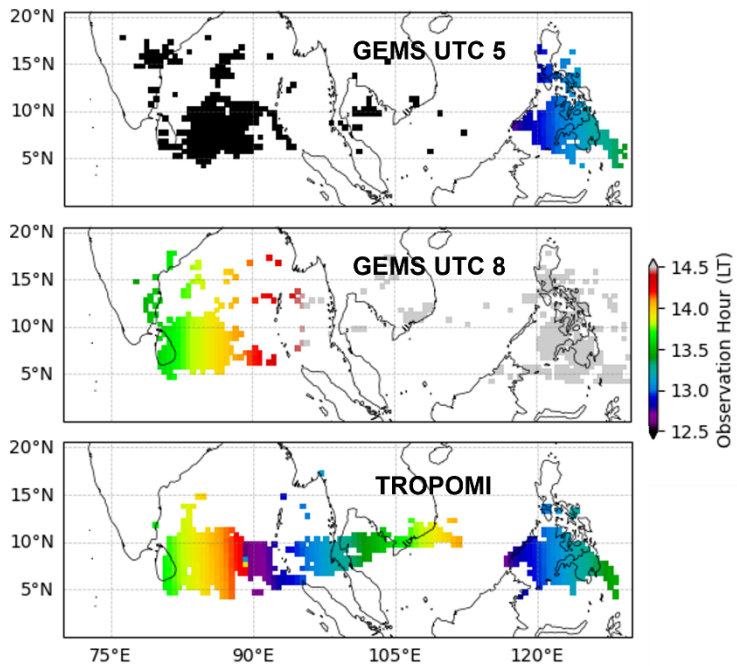

(d) June 5, 2024

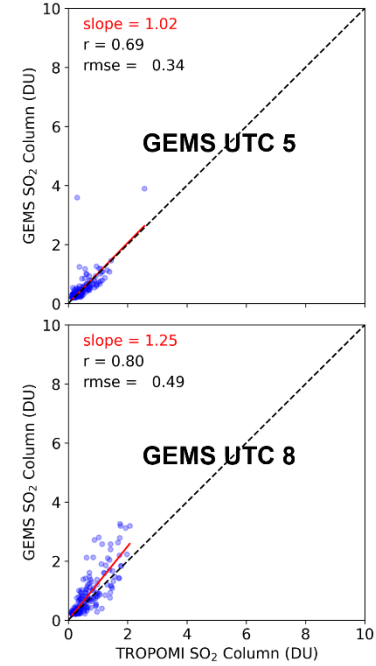

112 **Figure S7. Bias correction of GEMS SO<sub>2</sub> results based on TROPOMI benchmarks. (a, c) Spatial**  
113 **distribution and observation times of the SO<sub>2</sub> pixels used for spatiotemporal matching on (a) June 4 and (c)**  
114 **June 5. (b, d) Scatter plots comparing the bias-corrected GEMS SO<sub>2</sub> total column (scaled by a factor of 0.5)**  
115 **with coincident TROPOMI observations for (b) June 4 and (d) June 5.**  
116

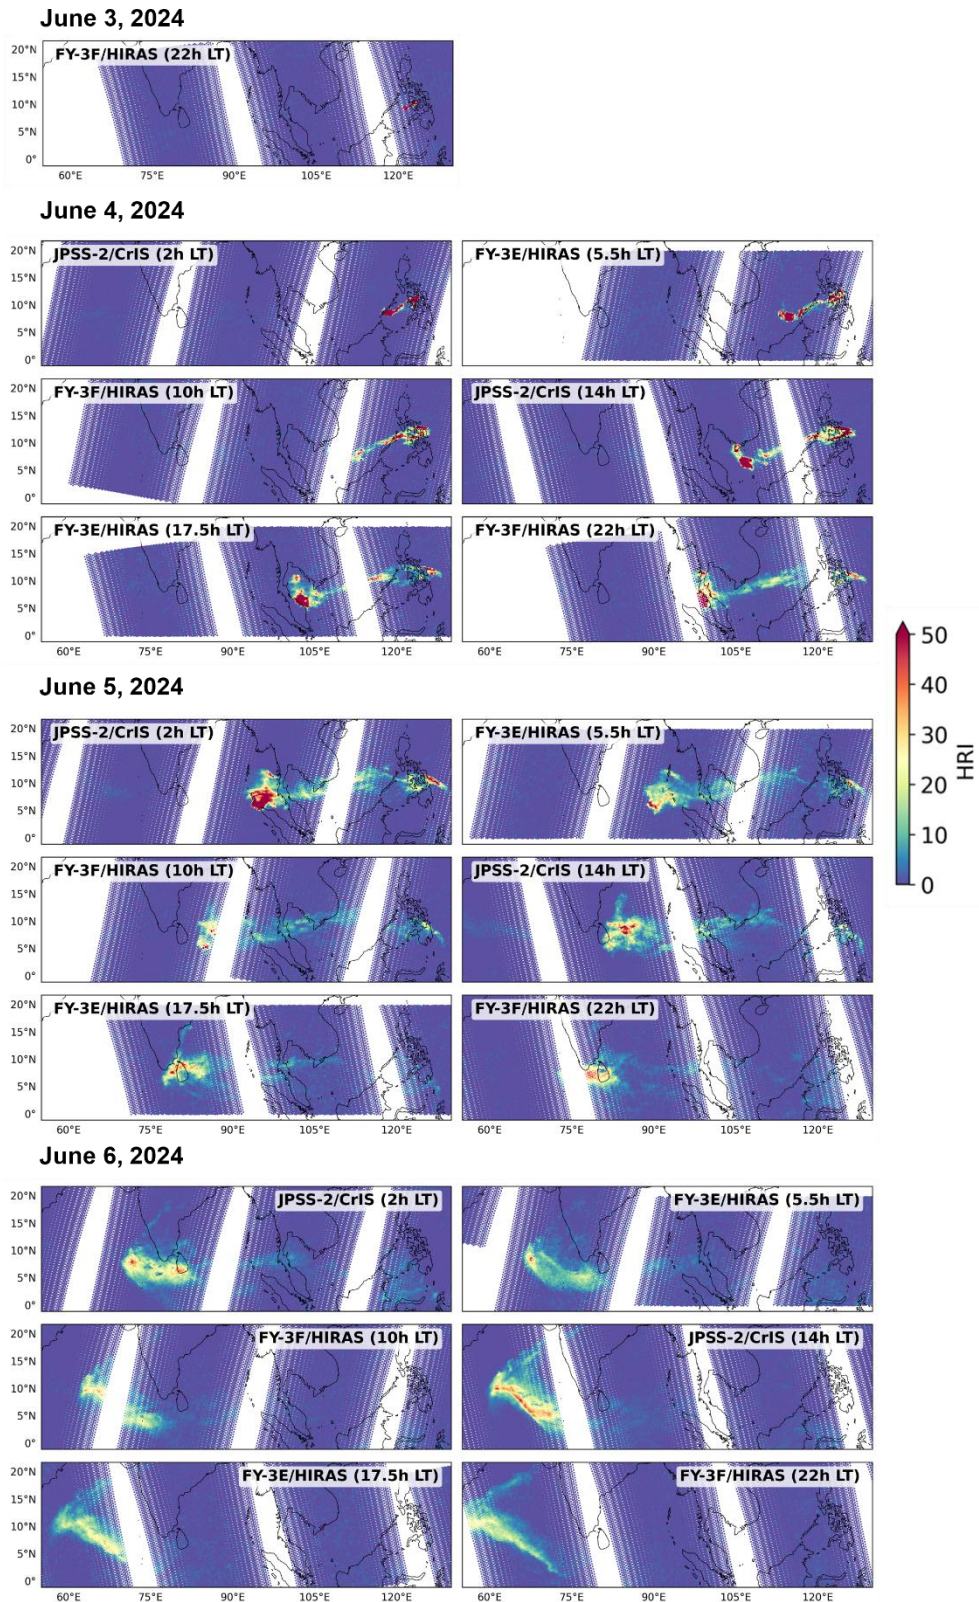

Figure S8. Spatial distribution of the SO<sub>2</sub> HRI derived from FY-3E/F HIRAS and JPSS-2 CrIS during June 3–6, 2024.

117  
118  
119  
120  
121

June 7, 2024

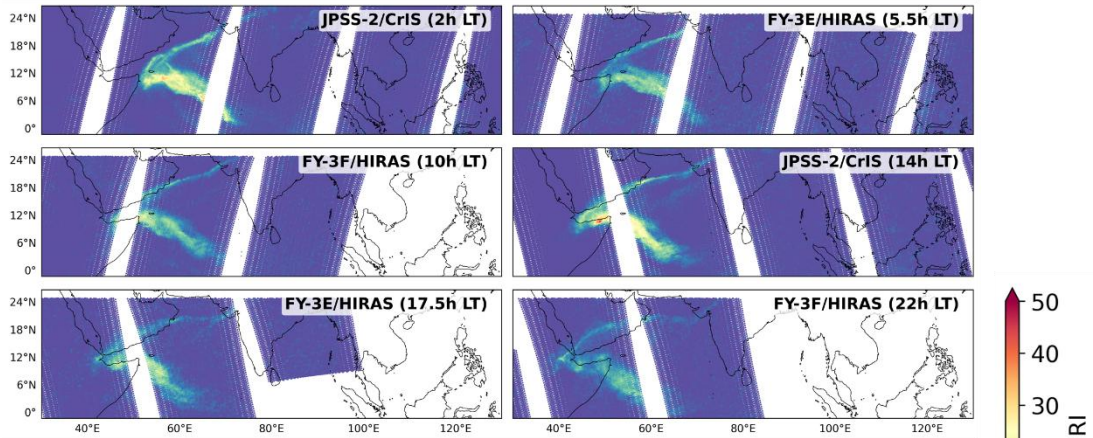

June 8, 2024

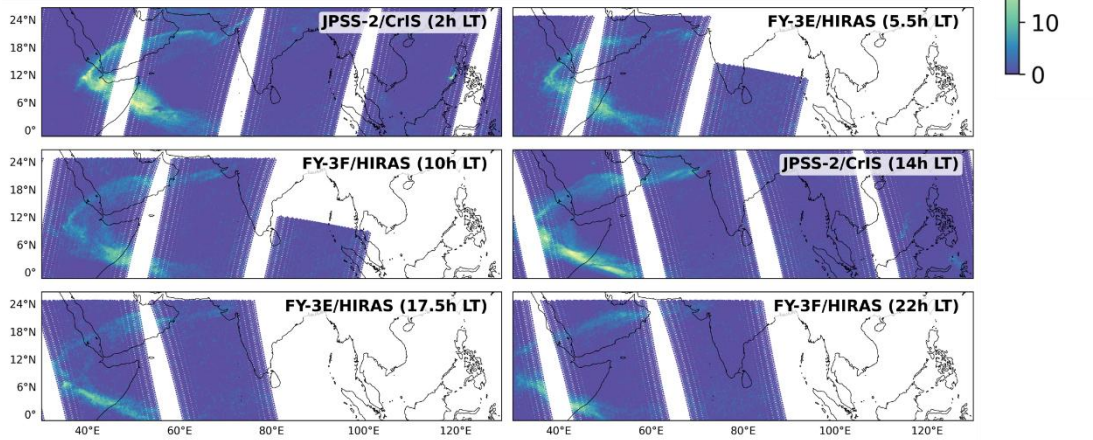

122  
123  
124  
125

Figure S9. Same as Fig. S8, but for June 7 and 8, 2024.

June 3, 2024

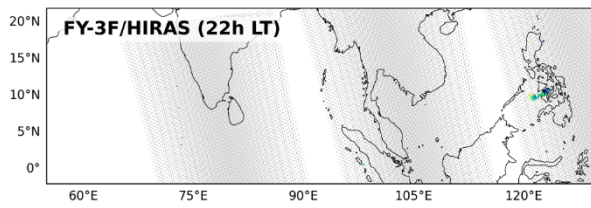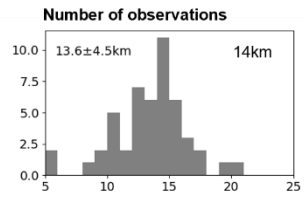

June 4, 2024

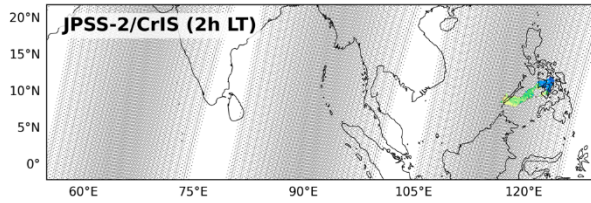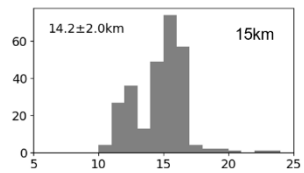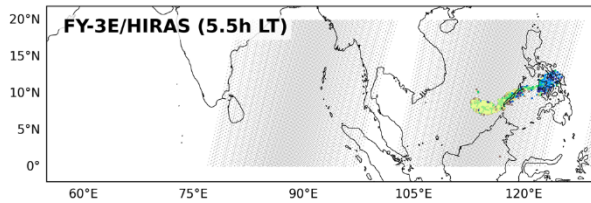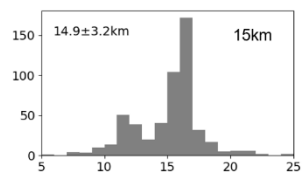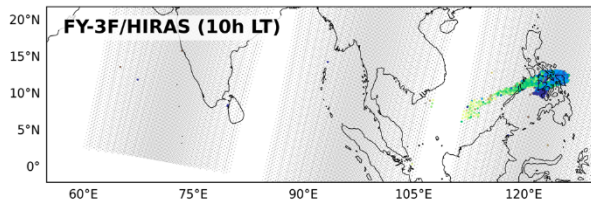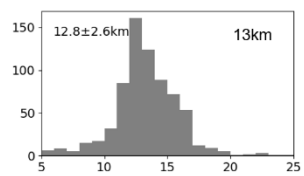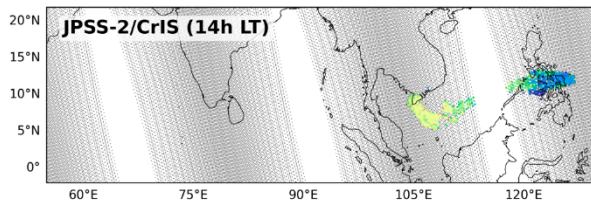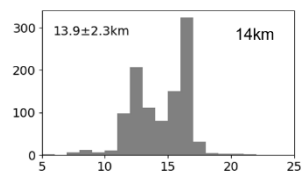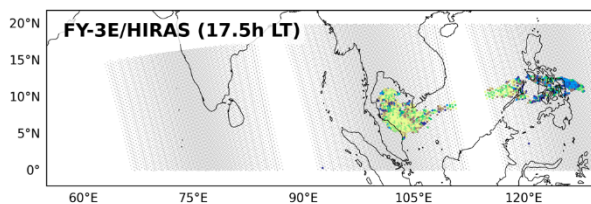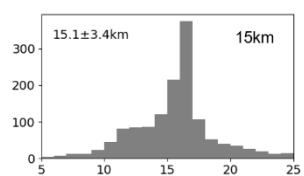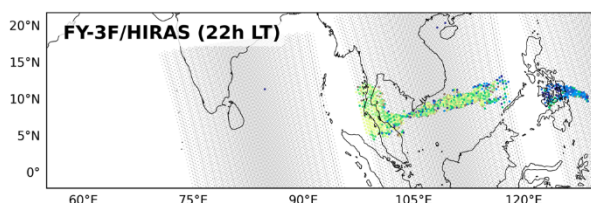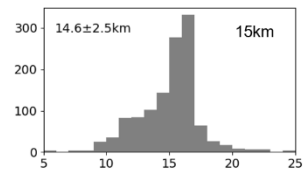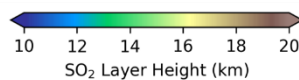

SO<sub>2</sub> layer height (km)

126  
127  
128  
129  
130  
131

Figure S10. The spatial distribution of the estimated SO<sub>2</sub> layer height and the corresponding histograms for the observations on June 3 and 4, 2024. The inset numbers within each histogram indicate the statistical characteristics of SO<sub>2</sub> height: the values on the left represent the mean ± standard deviation, while the value on the right represents the median.

June 5, 2024

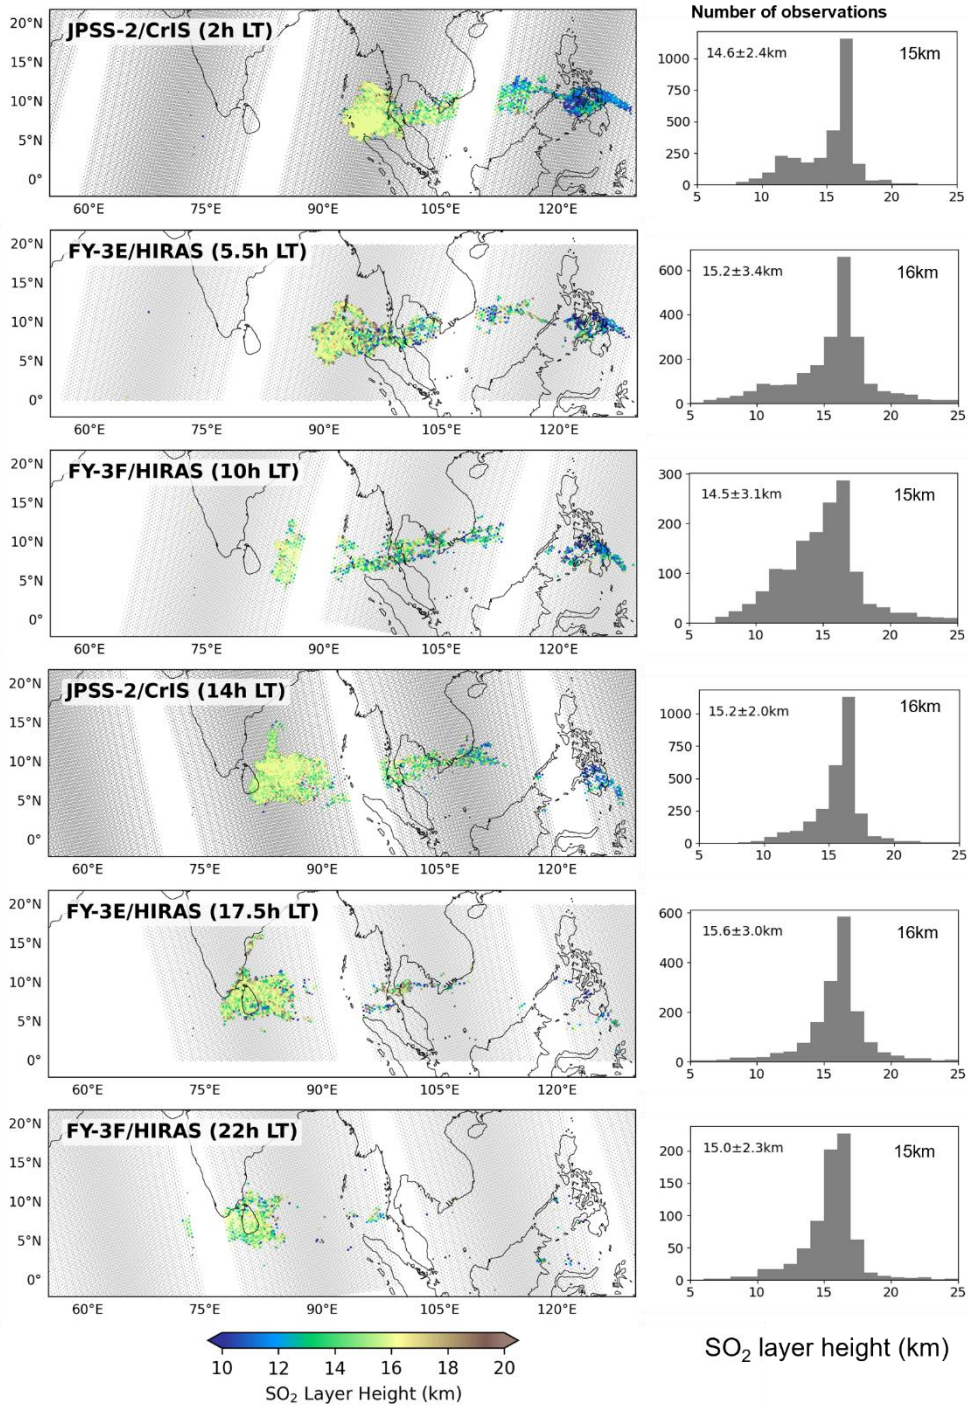

132  
133  
134

Figure S11. Same as Fig. S10, but for June 5, 2024.

June 6, 2024

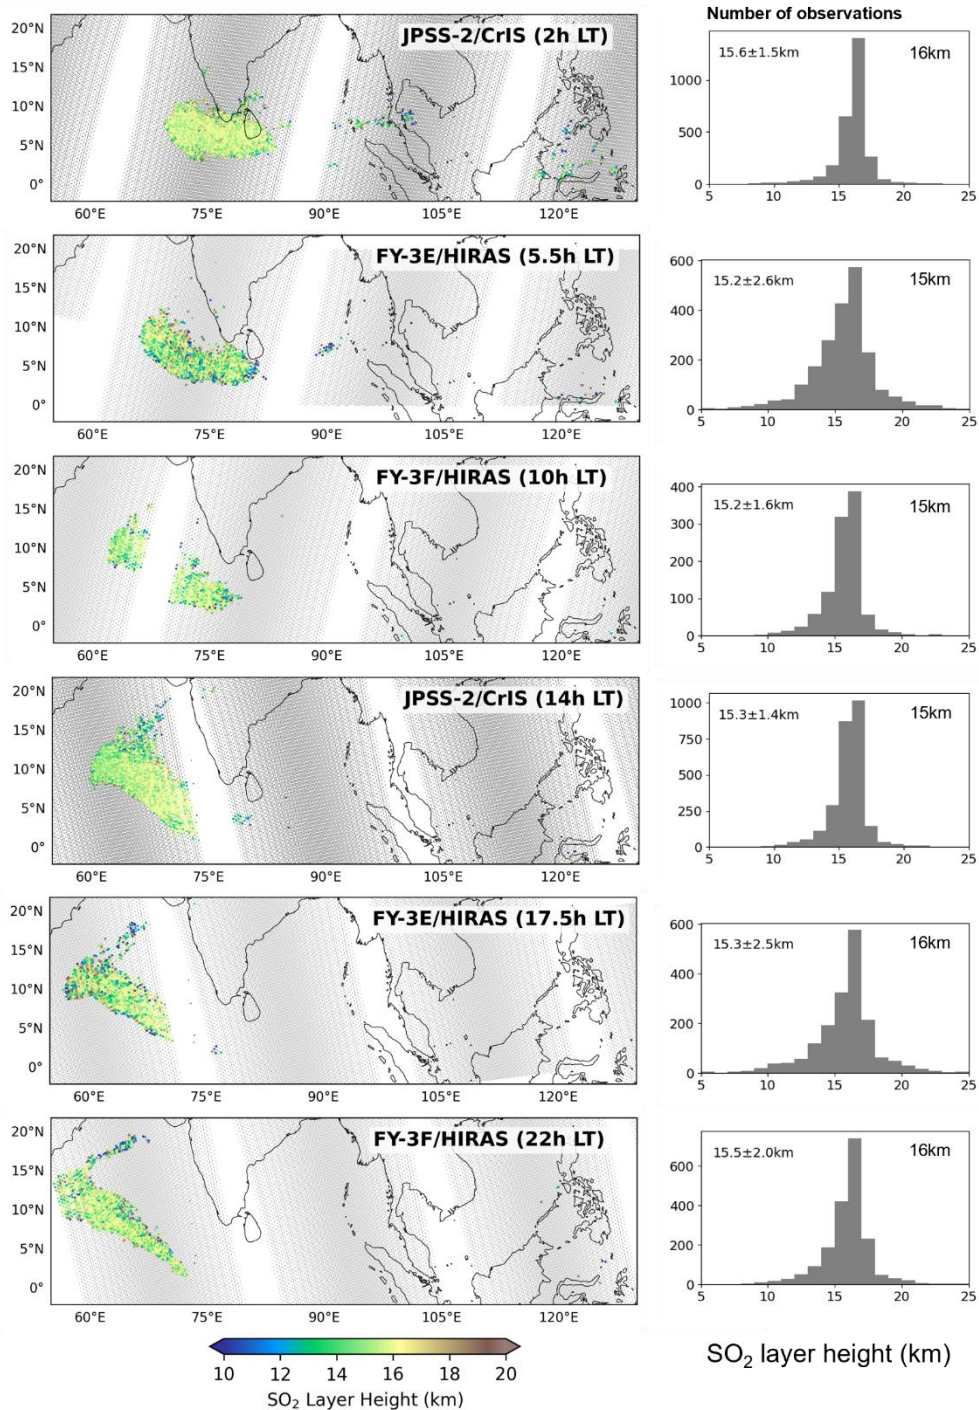

135  
136  
137  
138

Figure S12. Same as Fig. S10, but for June 6, 2024.

June 7, 2024

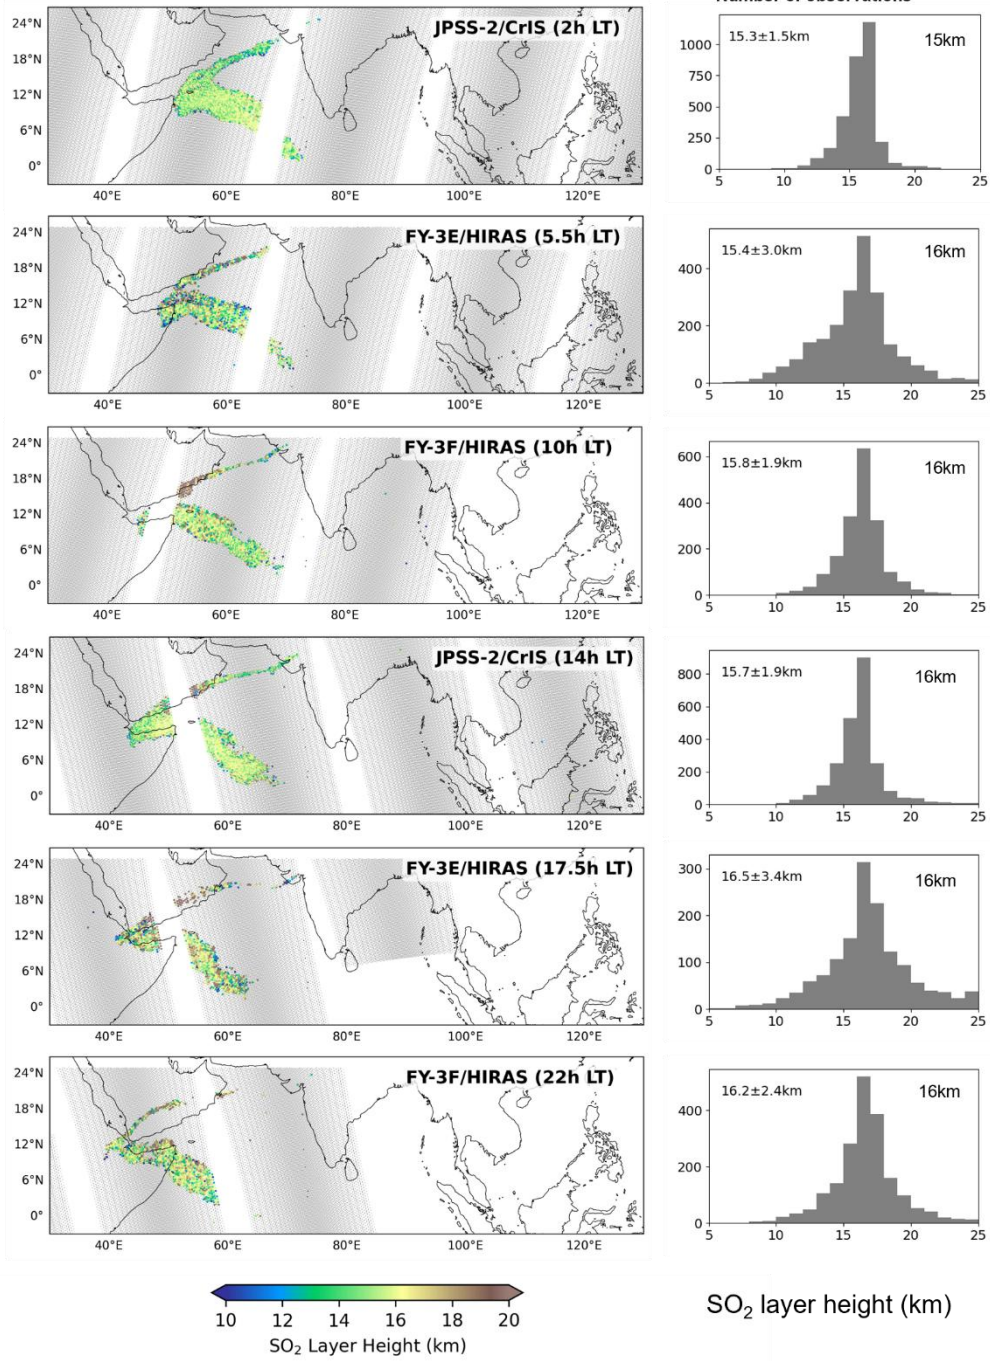

139  
140  
141  
142

Figure S13. Same as Fig. S10, but for June 7, 2024.

June 8, 2024

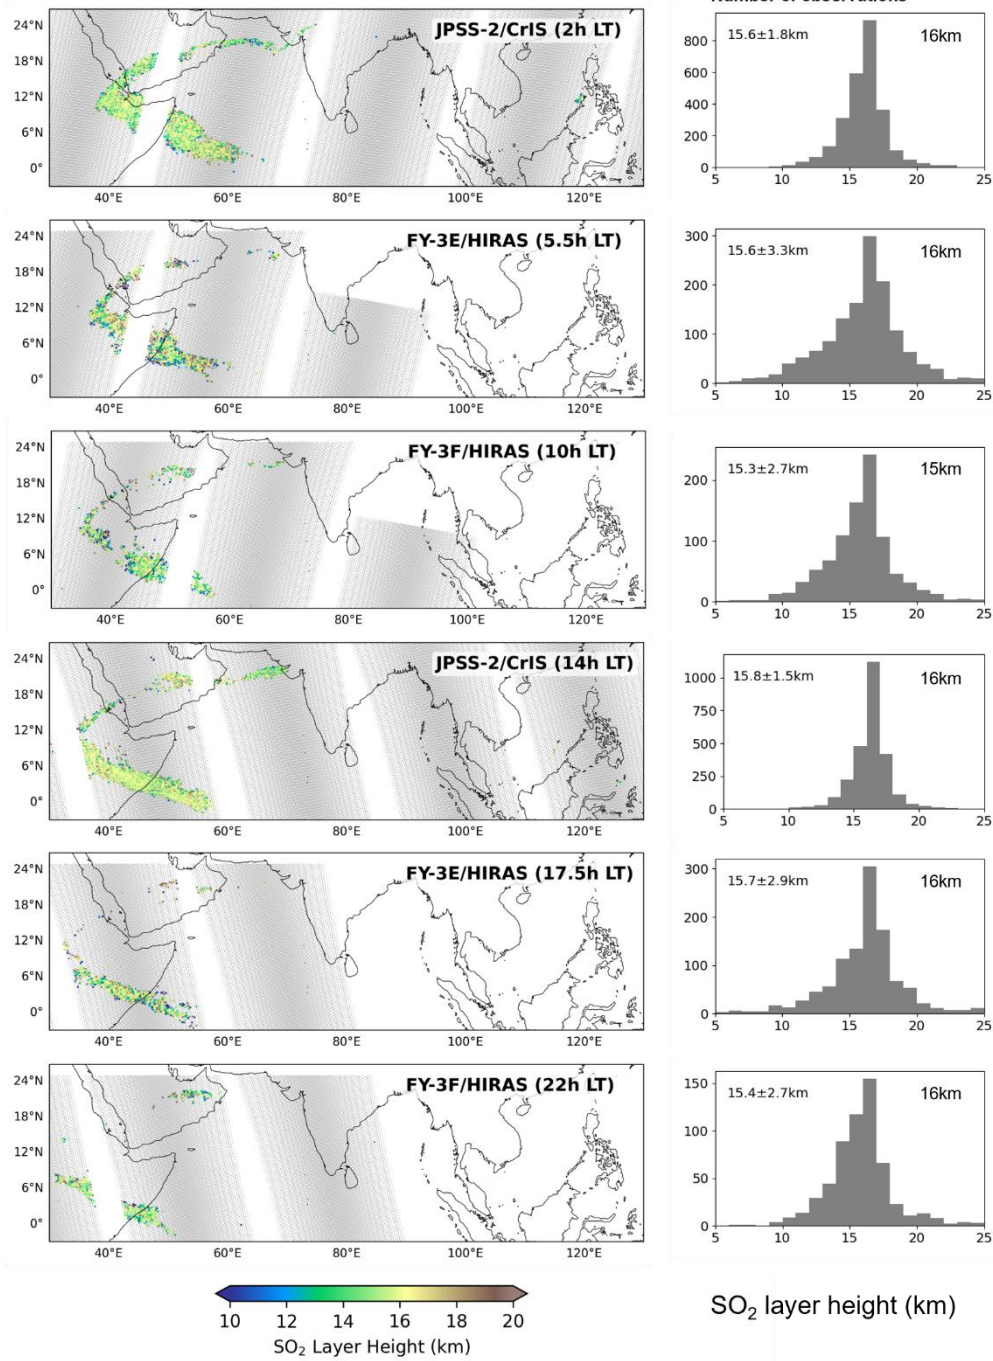

143  
144  
145  
146

Figure S14. Same as Fig. S10, but for June 8, 2024.

June 7, 2024

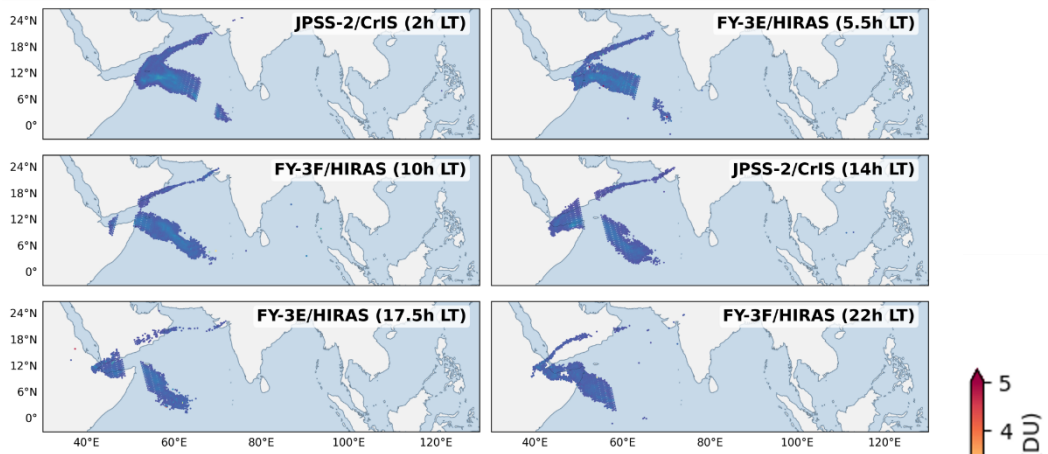

June 8, 2024

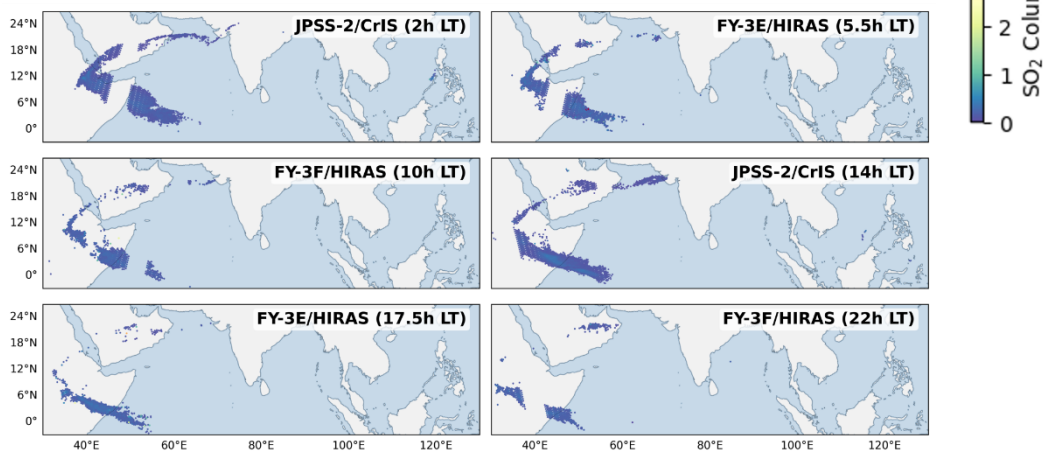

147  
148  
149

Figure S15. Same as Fig. 7, but for June 7 and 8, 2024.

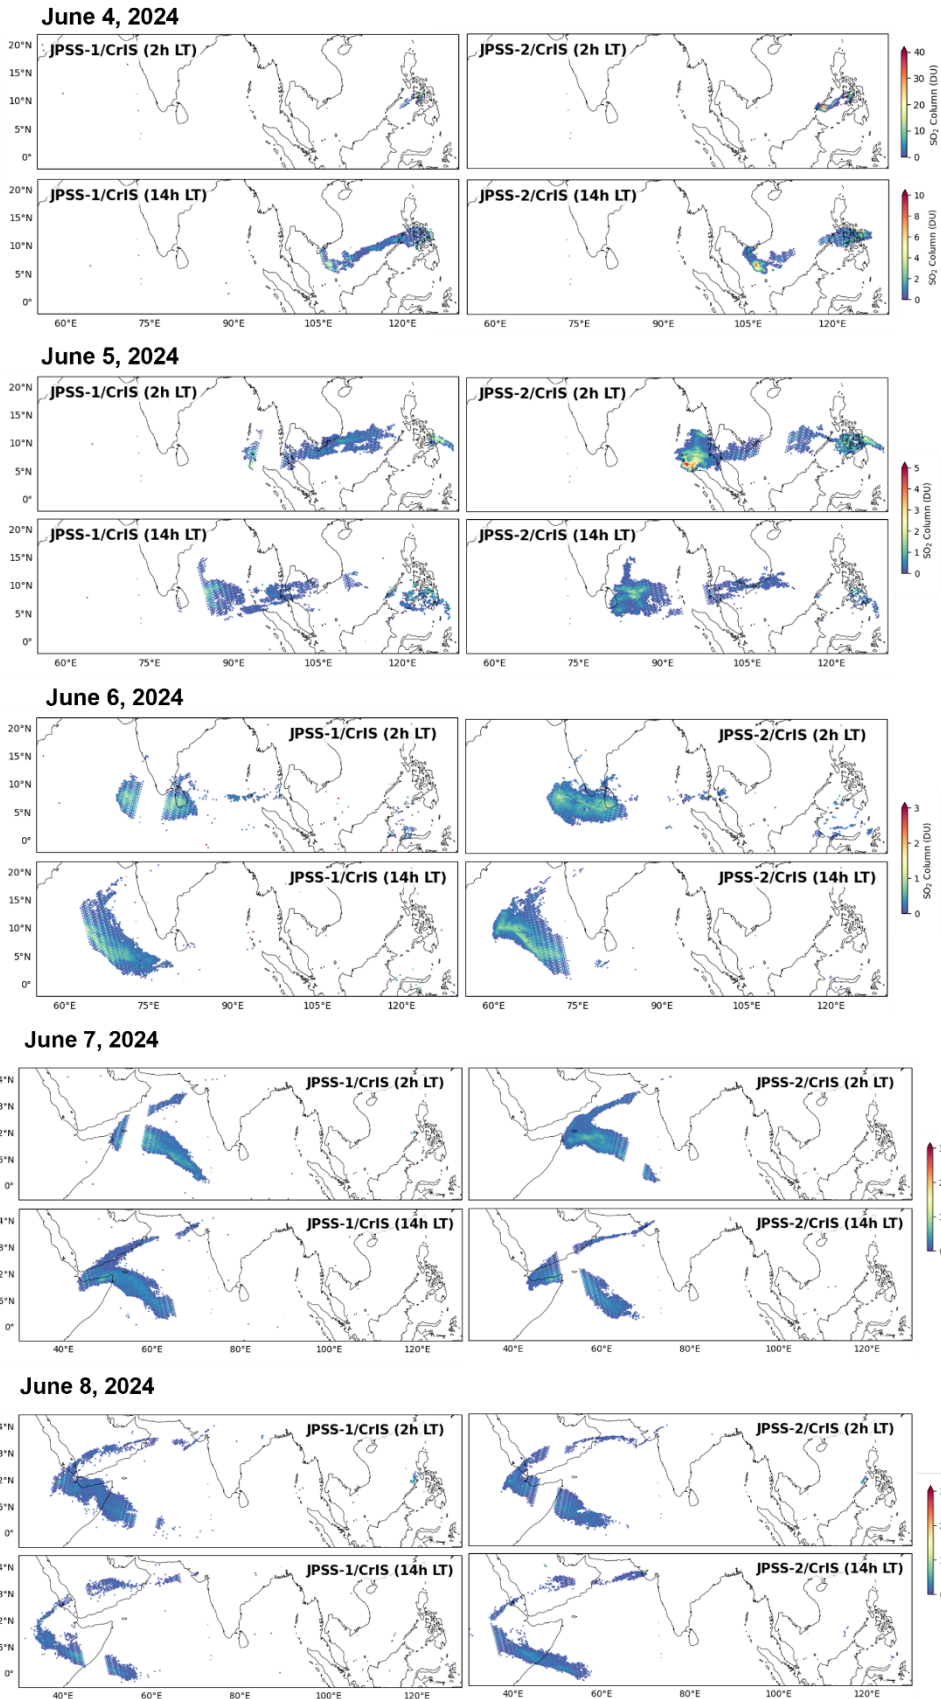

150

151  
152  
153  
154

Figure S16. Spatiotemporal evolution of volcanic  $\text{SO}_2$  total columns retrieved from JPSS-1/2 CrIS observations during June 4–8, 2024.

(a)

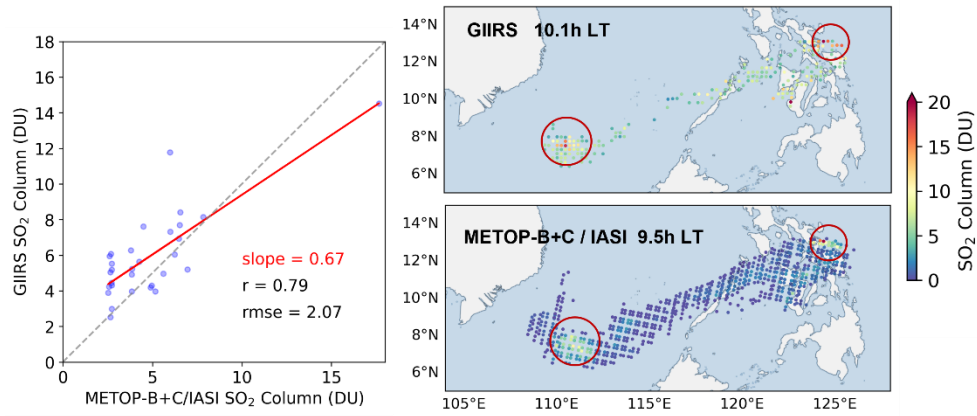

(b)

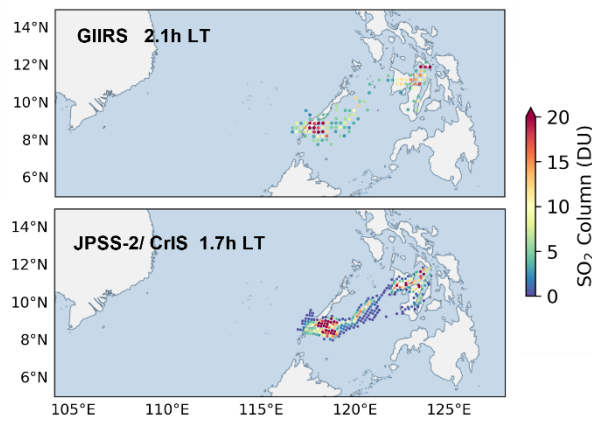

155 **Figure S17. Visual comparison of SO<sub>2</sub> total columns between FY-4B/GIIRS and (a) Metop-B/C IASI, (b)**  
156 **JPSS-2 CrIS. Panels illustrate the consistency in plume morphology, as temporal mismatches preclude**  
157 **direct point-to-point quantitative validation.**  
158  
159

160

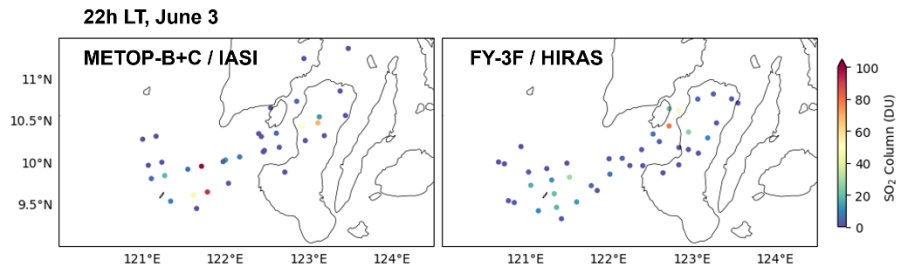

161

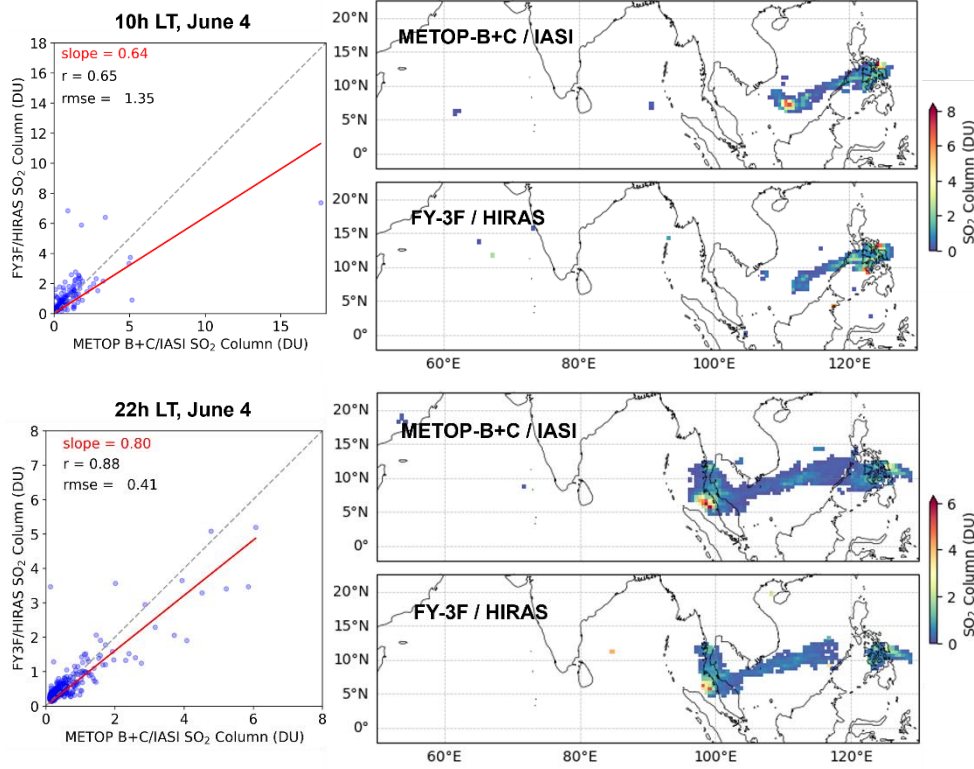

162  
163  
164  
165  
166

Figure S18. Similar to Fig. 9a but showing additional spatial comparisons of SO<sub>2</sub> total columns between Metop-B/C IASI and FY-3F/HIRAS during June 3–4, 2024.

167

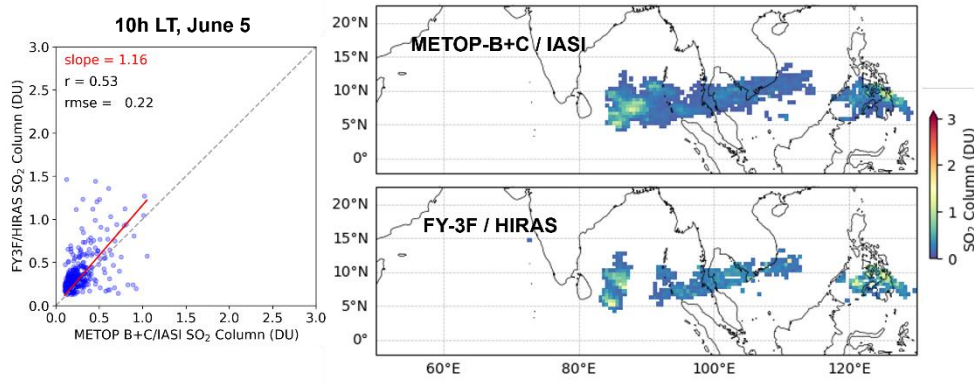

168

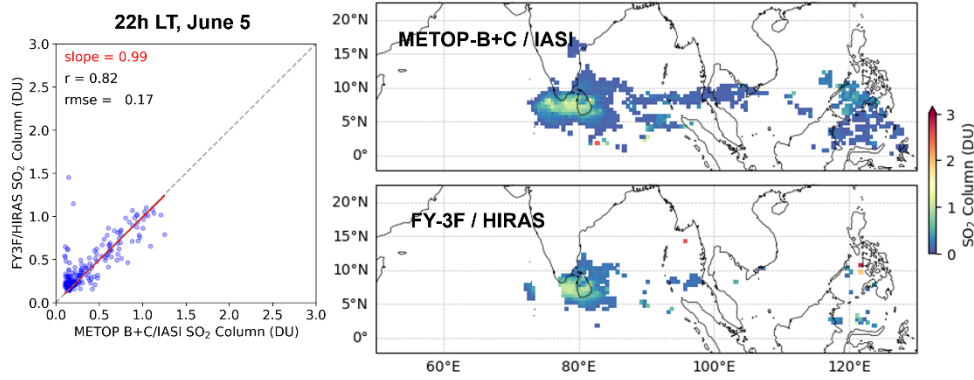

169

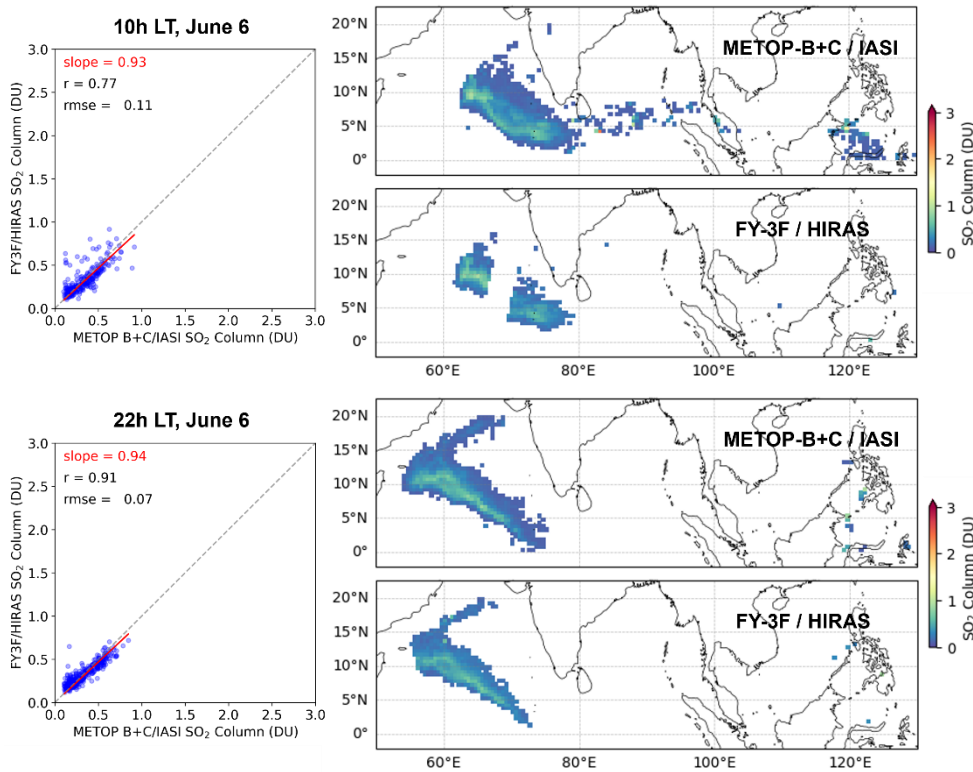

170  
171  
172  
173

Figure S19. Same as Fig. S18, but for June 5 and 6, 2024.

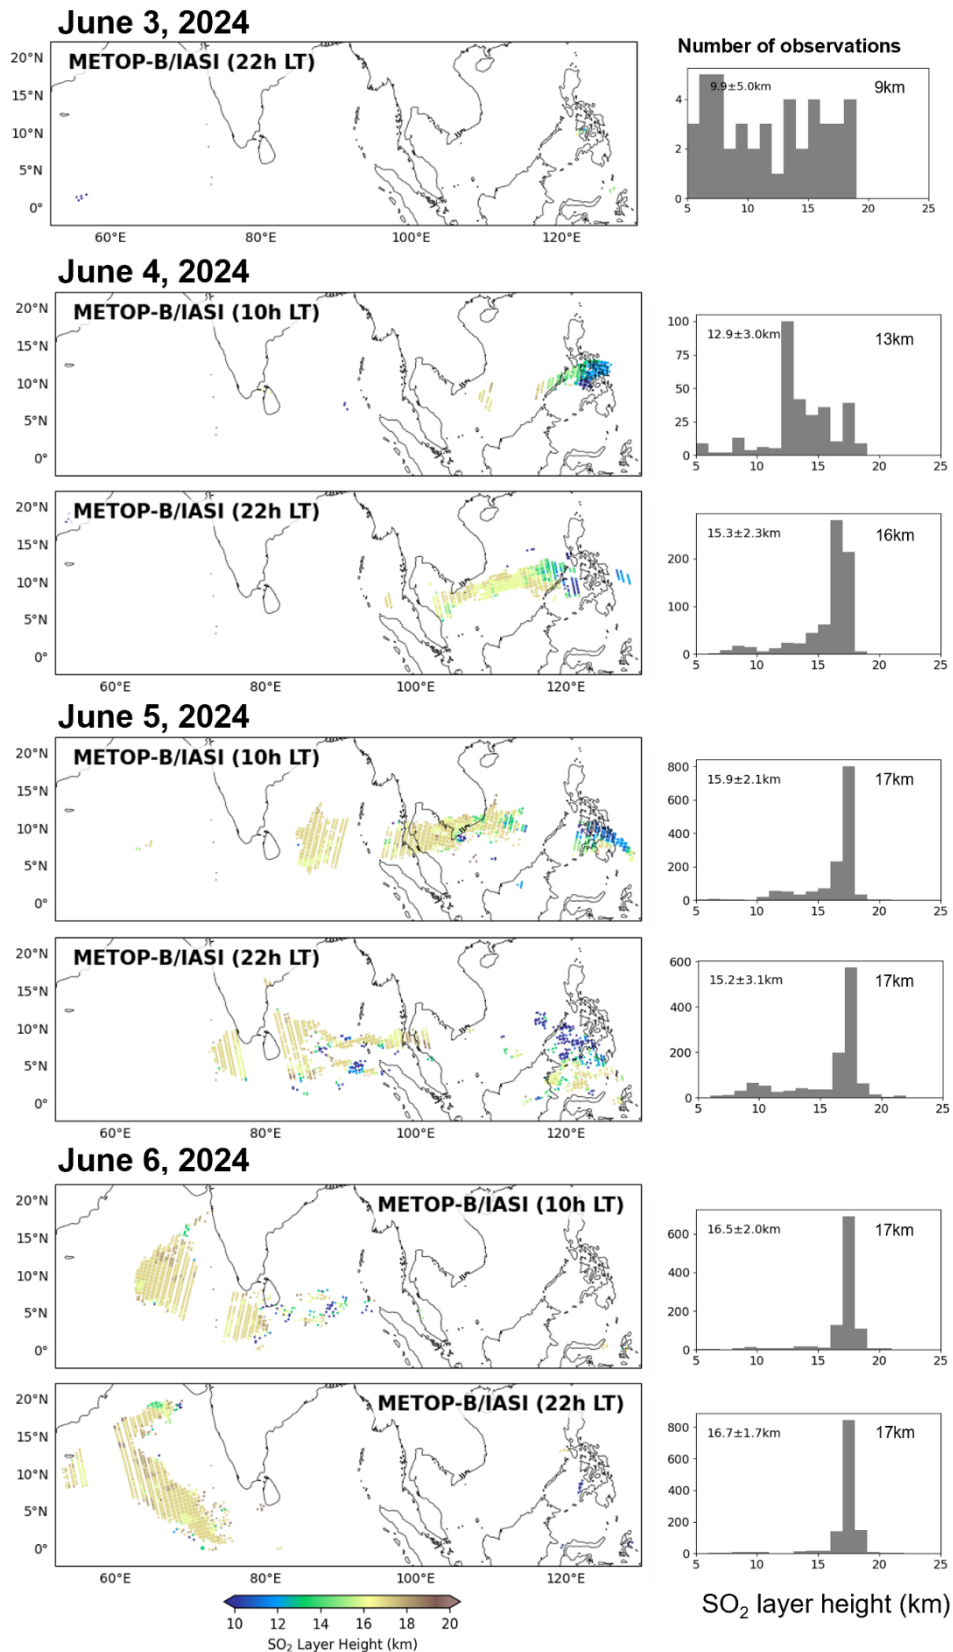

174  
175  
176  
177  
178  
179

**Figure S20.** The spatial distribution of the IASI SO<sub>2</sub> plume height and the corresponding histograms for the observations on June 3–6, 2024. The inset numbers within each histogram indicate the statistical characteristics of SO<sub>2</sub> height: the values on the left represent the mean ± standard deviation, while the value on the right represents the median.

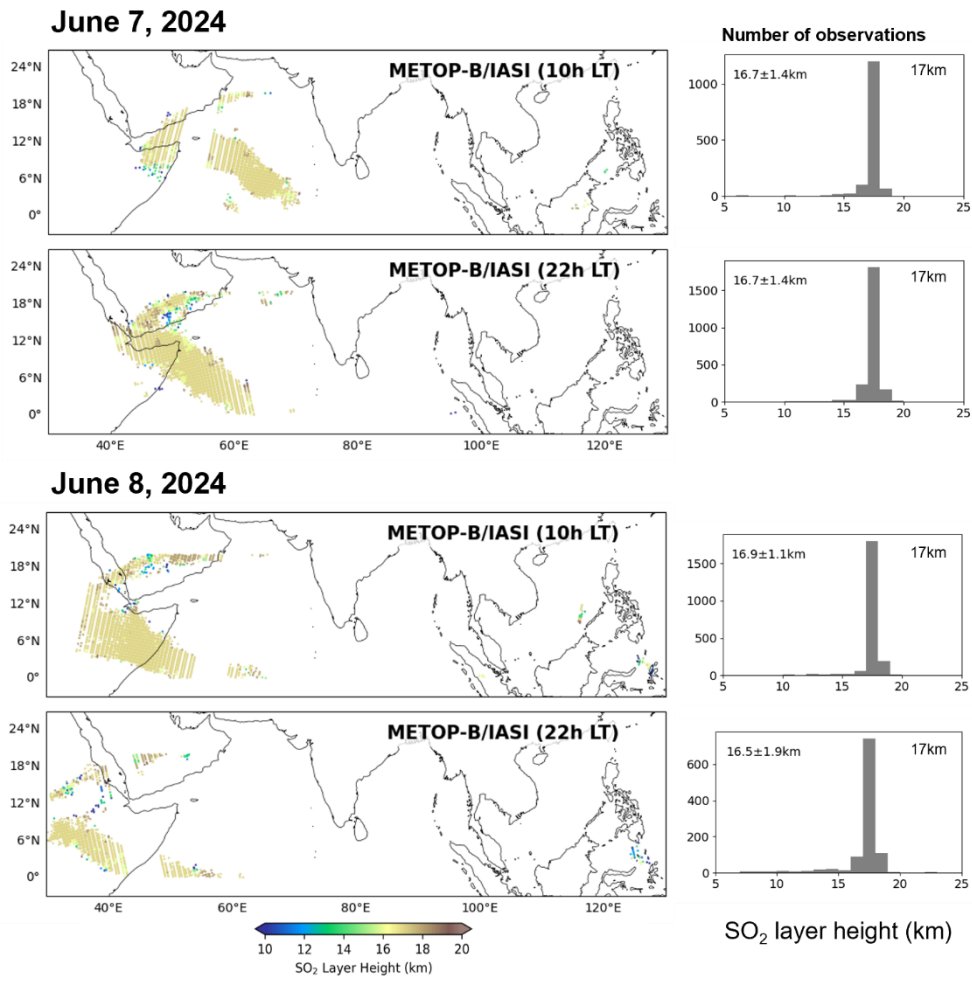

180  
181  
182  
183

Figure S21. Same as Fig. S20, but for June 7 and 8, 2024.

184

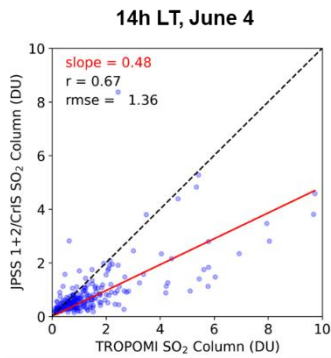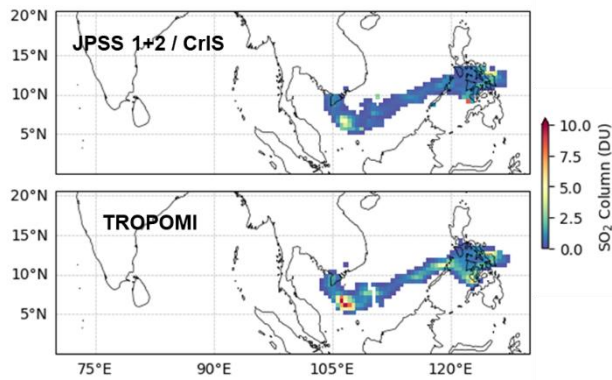

185

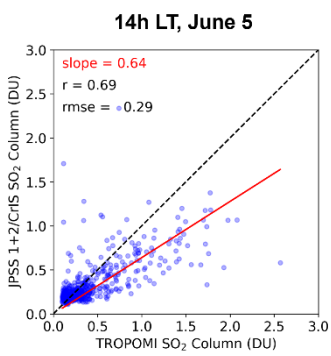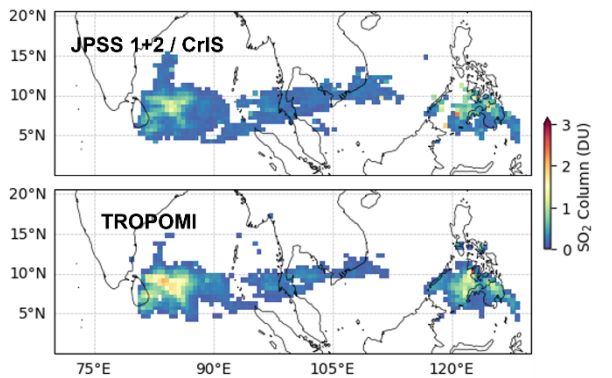

186

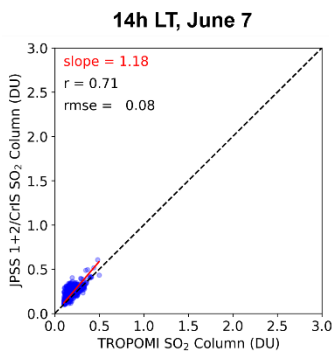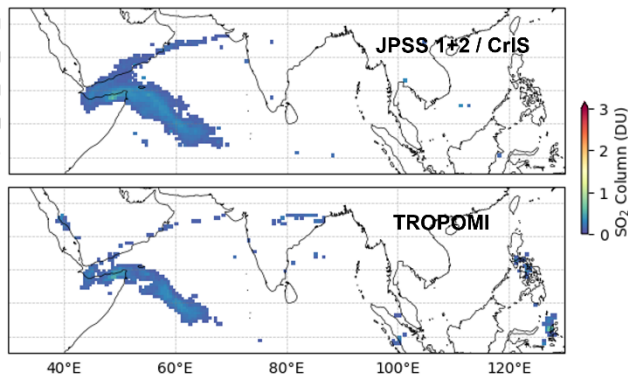

187

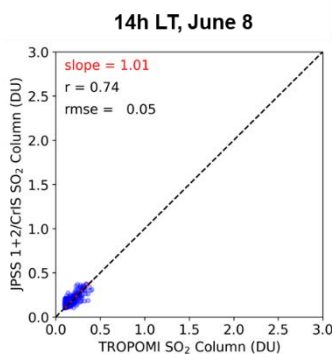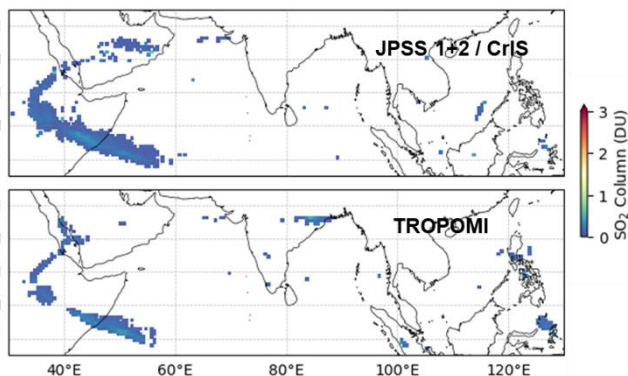

188

189

190

191

192

193

194

Figure S22. Similar to Fig. 10c but showing additional spatial comparisons of SO<sub>2</sub> total columns between JPSS-1/2 CrIS and TROPOMI during June 4–8, 2024.

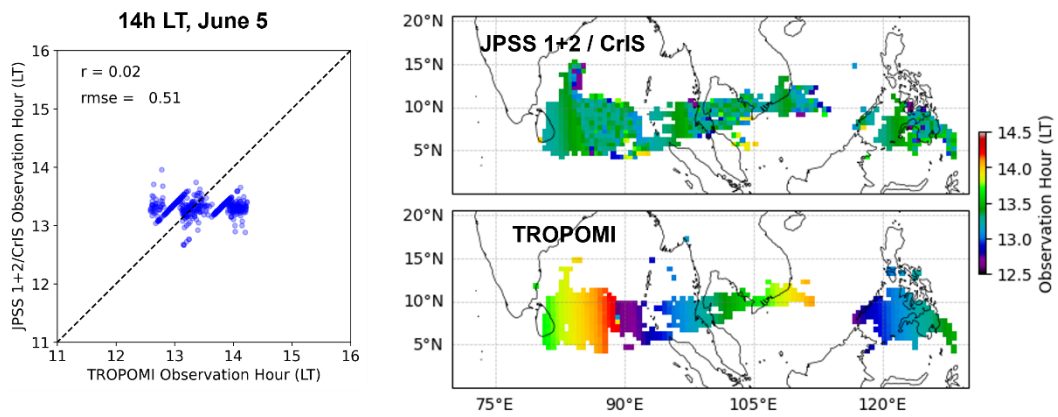

Figure S23. The mismatch of observation time between JPSS-1/2 CrIS and TROPOMI.

195  
 196  
 197  
 198

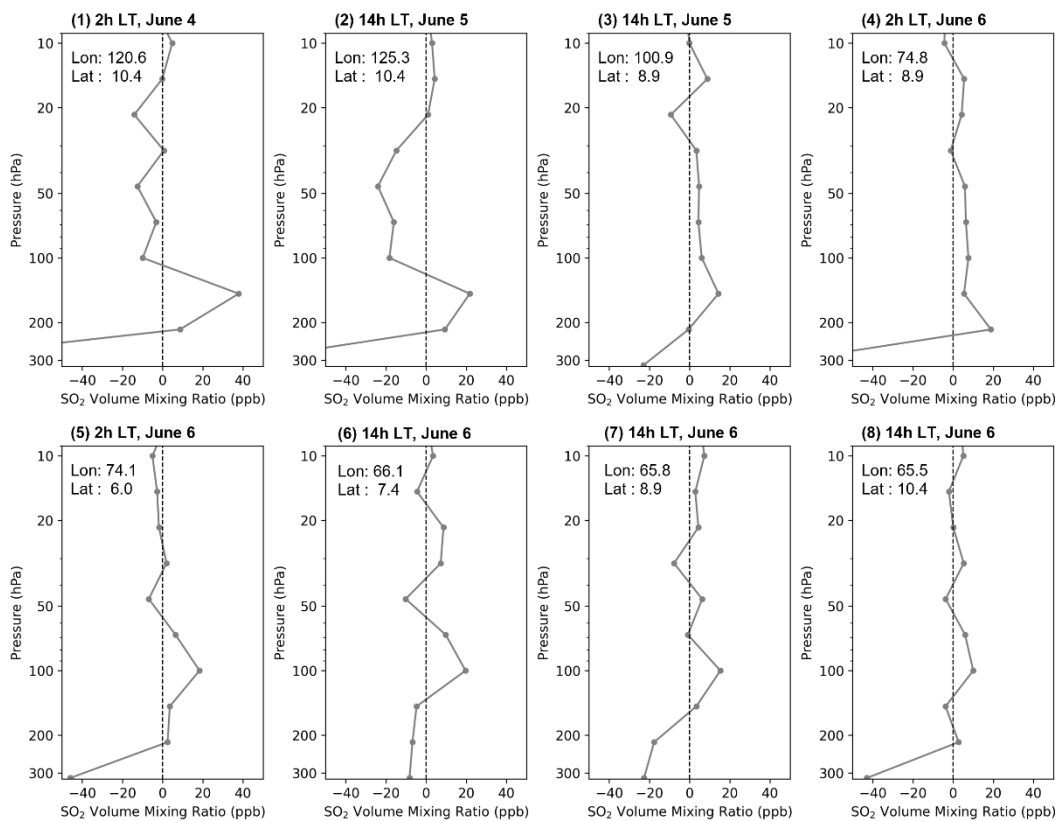

200  
 201  
 202  
 203  
 204  
 205  
 206

**Figure S24. Aura/MLS SO<sub>2</sub> vertical profiles corresponding to the specific footprints marked in Figure 11. Panels (1)–(8) display the vertical distribution of Volume Mixing Ratios (VMR) against pressure for the selected geolocation points. The coordinates (latitude/longitude) and observation times are annotated in each panel.**

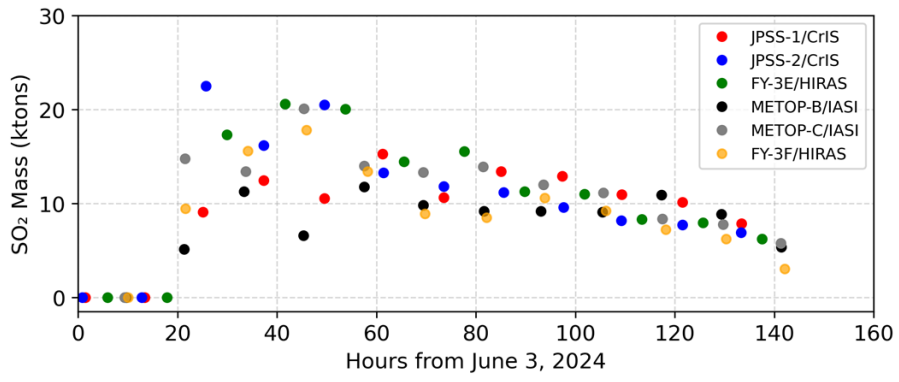

207  
 208  
 209  
 210  
 211

**Figure S25. Time series of SO<sub>2</sub> mass loading derived from individual polar-orbiting infrared sensors without spatial gap-filling.**

(a)

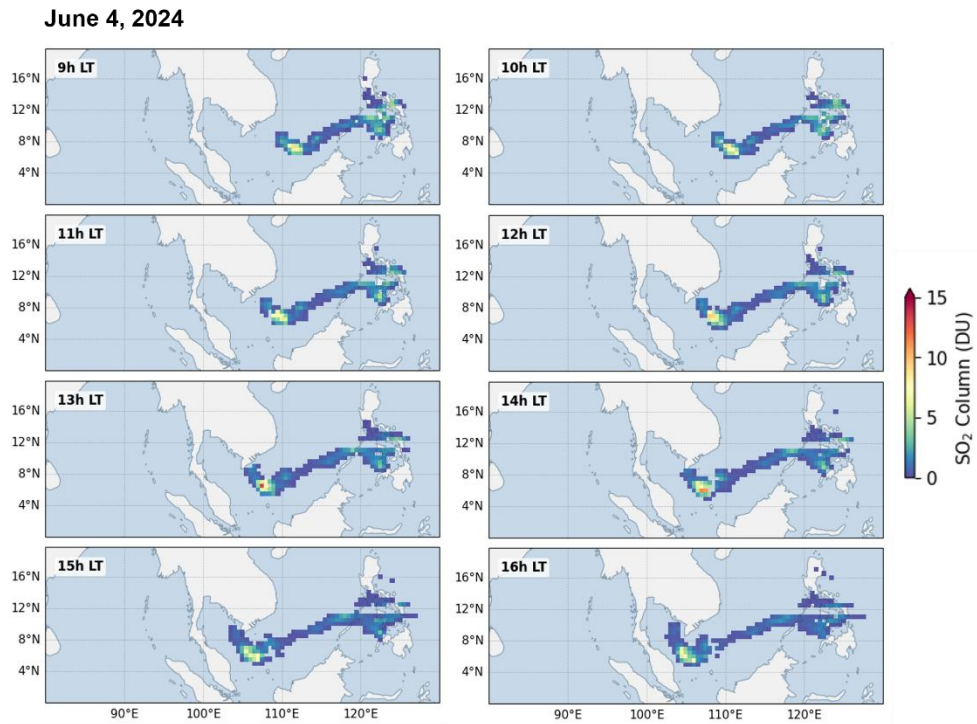

(b)

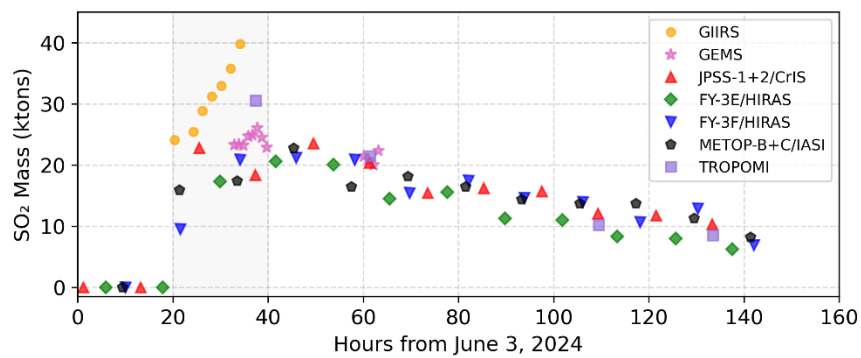

212 **Figure S26. Impact of cloud screening on GEMS SO<sub>2</sub> mass quantification. (a) Similar to Fig. 7 but with a**  
213 **cloud fraction threshold ( $< 0.7$ ) applied. The resultant spatial discontinuities within the plume indicate the**  
214 **rejection of SO<sub>2</sub>-rich pixels mixed with clouds. (b) Time series of SO<sub>2</sub> mass loading derived from the cloud-**  
215 **screened dataset, revealing a systematic underestimation compared to the baseline results (Fig. 12a) due to**  
216 **the compromised spatial integrity.**

217  
218

June 3, 2024

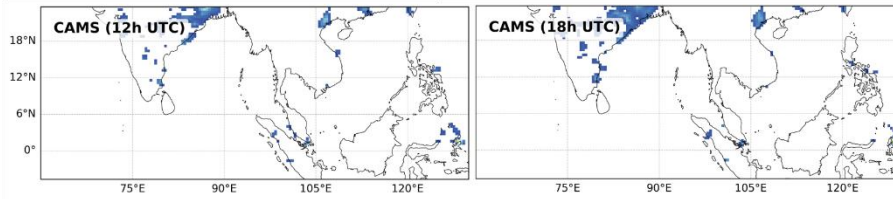

June 4, 2024

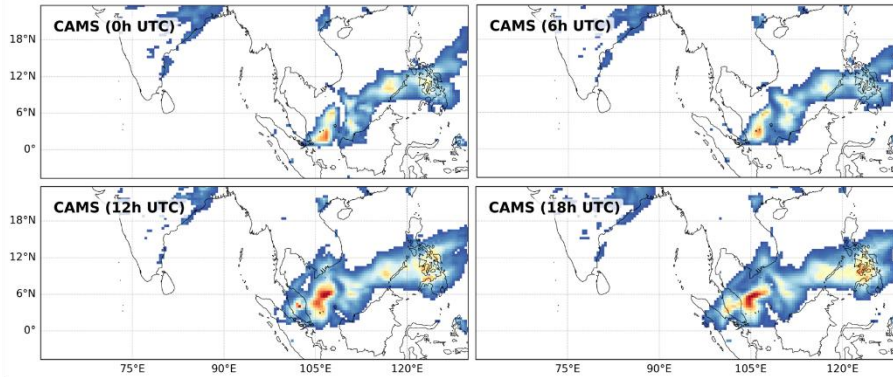

June 5, 2024

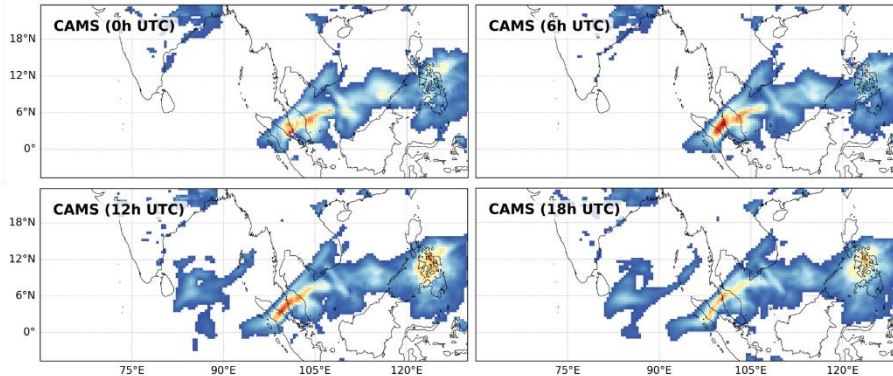

June 6, 2024

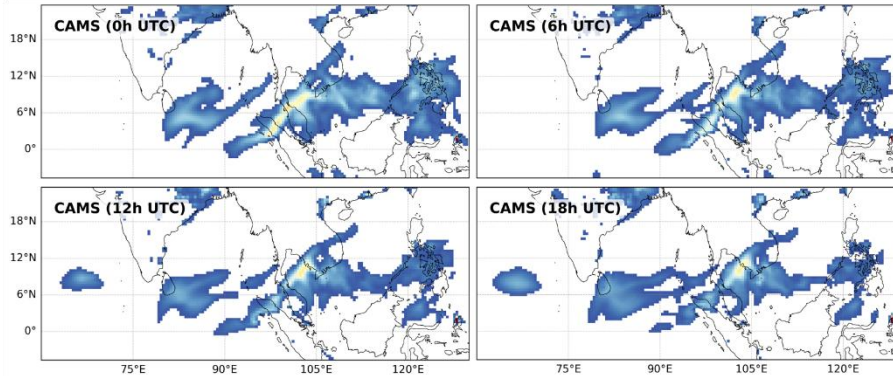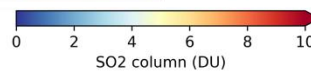

219  
220  
221  
222  
223  
224

Figure S27. Spatiotemporal evolution of SO<sub>2</sub> total columns simulated by the CAMS forecast model. The panels display model snapshots at 6-hour intervals (00:00, 06:00, 12:00, and 18:00 UTC) from June 3 to June 6, 2024, showing the predicted transport trajectory.

June 3, 2024

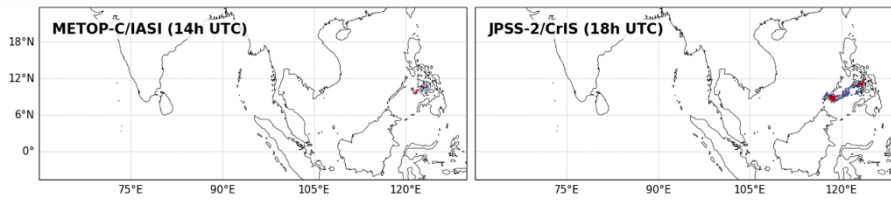

June 4, 2024

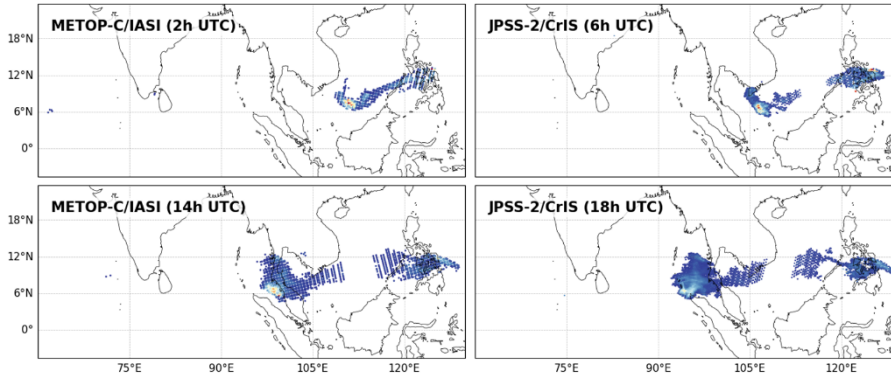

June 5, 2024

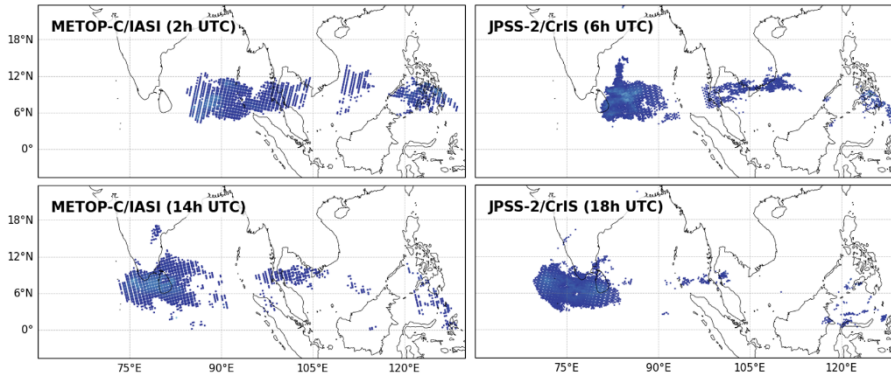

June 6, 2024

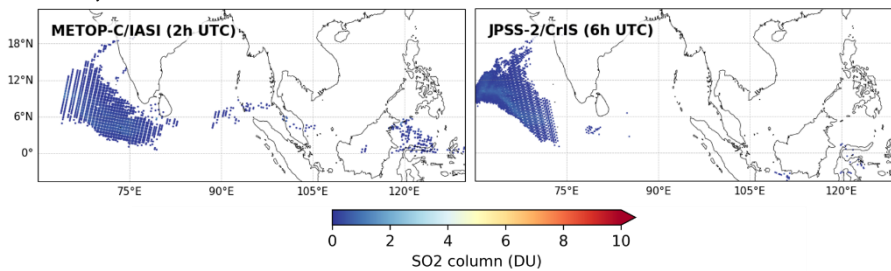

225  
226  
227  
228  
229  
230

Figure S28. Satellite-observed SO<sub>2</sub> total columns (Cris and IASI) temporally aligned with CAMS simulations. The observations are selected to match the CAMS output times in Fig. S27 (UTC) to facilitate direct comparison of plume morphology and transport speed.

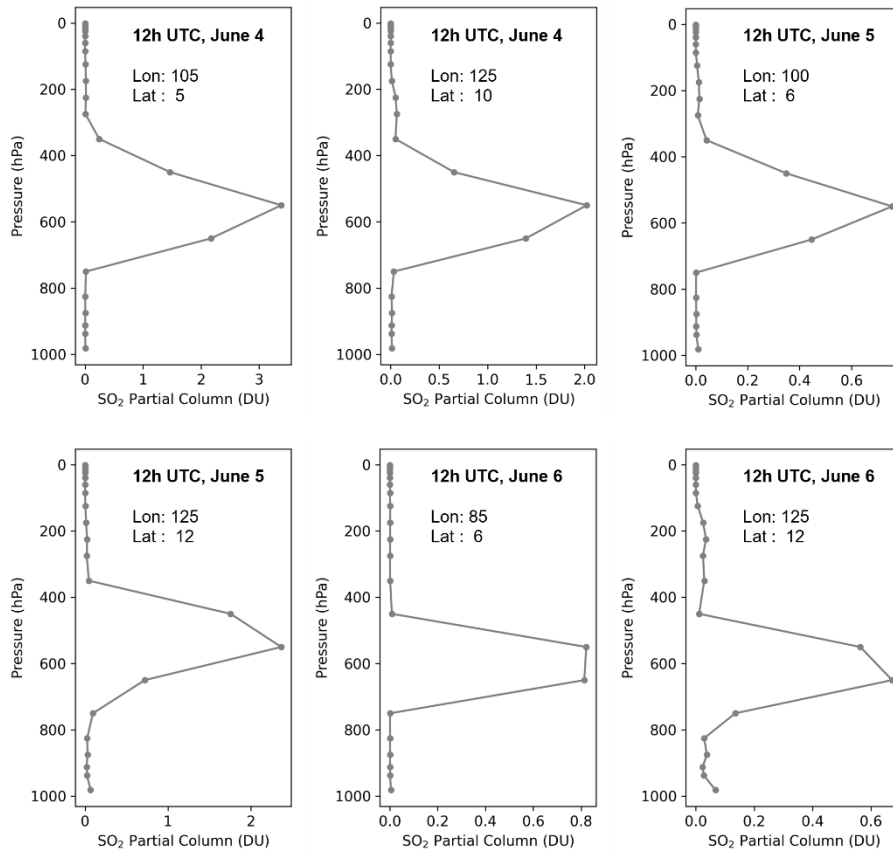

231  
 232  
 233  
 234  
 235  
 236

**Figure S29. Vertical profiles of SO<sub>2</sub> simulated by the CAMS forecast model at selected spatiotemporal points. The panels display the vertical distribution of SO<sub>2</sub> partial columns against pressure levels for June 4–6 (12:00 UTC).**
